# Supplementary material for: Synthesis of new N-substituted aminoquercitols from naturally available (+)-proto-quercitol and their α-glucosidase inhibitory activity
Source: Royal Society of Chemistry journal article supplement (doi:10.1039/c2md20227a), 2012-01-01
Supplement: c2md20227a.pdf [file c2md20227a.pdf]

**Synthesis of new *N*-substituted aminoquercitols from naturally  
available (+)-*proto*-quercitol and their  $\alpha$ -glucosidase  
inhibitory activity**

**Wisuttaya Worawalai, Sumrit Wacharasindhu and Preecha Phuwapraisirisan\***

*Natural Products Research Unit, Department of Chemistry, Faculty of Science, Chulalongkorn University,  
Bangkok 10330, Thailand*

## General

All moisture-sensitive reactions were carried out under a nitrogen atmosphere. All solvents were distilled prior to use. Mass spectra were measured by ESI-MS and High Resolution (HR)-ESI-MS were obtained from a microTOF Bruker mass spectrometer.  $^1\text{H}$  and  $^{13}\text{C}$  NMR spectra were recorded ( $\text{CDCl}_3$ ,  $\text{D}_2\text{O}$ , and  $\text{CD}_3\text{OD}$  as solvent) at 400 and 100 MHz, respectively, on a Varian Mercury<sup>+</sup> 400 NMR and a Bruker (Avance) 400 NMR spectrometer using tetramethylsilane (TMS) as an internal standard. Chemical shifts are reported in ppm downfield from TMS. Optical rotations were measured on a Perkin-Elmer 341 polarimeter using a cell with 2 mL capacity and a 10 cm path length. Analytical thin layer chromatography (TLC) was performed on pre-coated Merck silica gel 60 F<sub>254</sub> plates (0.25 mm thick layer) and visualized by potassium permanganate as the detecting agent. Column chromatography were performed using Merck silica gel 60 (70-230 mesh), Sephadex LH-20, and Dowex 50W-X8 ( $\text{H}^+$ ). Sucrose, maltose, baker's yeast  $\alpha$ -glucosidase, rat intestinal acetone powder, and *p*-nitrophenyl- $\alpha$ -D-glucopyranoside were purchased from Sigma-Aldrich (St. Louis, MO, USA). Glucose assay kit was purchased from Human Gesellschaft für Biochemica und Diagnostica mbH (Germany). Acarbose was obtained from Bayer (Germany).

### General procedure for synthesis of *N*-acyl-aminoquercitols 4-7

To a stirred solution of aminocyclitol **2** or **3** (0.14 mmol) in  $\text{CH}_2\text{Cl}_2$  (1.4 mL) was added DMAP (trace amount) and TEA (1.09 mmol). After the clear solution obtained, anhydride compounds (0.41 mmol) were added slowly, and the mixture was stirred at room temperature for 3 h. The reaction mixture was extracted with  $\text{CH}_2\text{Cl}_2$  ( $3 \times 10$  mL), washed with brine, dried over anhydrous  $\text{Na}_2\text{SO}_4$ , filtered and concentrated under reduced pressure. The crude product was treated with trifluoroacetic acid (0.74 mmol) in THF (2 mL) and stirred at room temperature for 4 h. The reaction mixture was evaporated to dryness, redissolved in EtOAc, and extracted with  $\text{H}_2\text{O}$  ( $3 \times 10$  mL). The combined aqueous layers were loaded onto Diaion HP-20 column and washed with  $\text{H}_2\text{O}$  followed by MeOH. Fractions eluted with  $\text{H}_2\text{O}$  were lyophilized to afford *N*-acyl aminoquercitols.

*N*-((1*S*,2*S*,3*S*,4*S*,5*R*)-2,3,4,5-tetrahydrocyclohexyl)acetamide (**4**). White solid (74%).  $^1\text{H}$  NMR ( $\text{D}_2\text{O}$ , 400 MHz)  $\delta$  3.91 (br s, 1H, H-2), 3.80 (br d,  $J = 12.0$  Hz, 1H, H-1), 3.42-3.50 (m, 3H, H-3,4,5), 1.93 (s, 3H,  $-\text{CH}_3$ ), 1.82 (m, 1H, H-6), 1.66 (q,  $J = 12.0$  Hz, 1H, H-6);  $^{13}\text{C}$  NMR ( $\text{D}_2\text{O}$  + one drop acetone- $d_6$ , 100 MHz)  $\delta$  173.3, 74.2, 72.2, 70.8, 69.9, 47.0, 31.4, 21.8; HRMS  $m/z$  228.0841 [ $\text{M}+\text{Na}$ ]<sup>+</sup> (calcd for  $\text{C}_8\text{H}_{15}\text{NO}_5\text{Na}$ , 228.0848).

*N*-((1*S*,2*S*,3*S*,4*S*,5*R*)-2,3,4,5-tetrahydrocyclohexyl)butyramide (**5**). White solid (63%).  $^1\text{H}$  NMR ( $\text{D}_2\text{O}$ , 400 MHz)  $\delta$  3.89 (m, 1H, H-2), 3.77 (m, 1H, H-1), 3.41-3.45 (m, 3H, H-3,4,5), 2.13 (t,  $J = 7.2$  Hz, 2H,  $-\text{OCCCH}_2-$ ), 1.79 (m, 1H, H-6), 1.63 (q,  $J = 12.0$  Hz, 1H, H-6), 1.48 (m, 2H,  $-\text{CH}_2-$ ), 0.78 (t,  $J = 7.2$  Hz, 3H,  $-\text{CH}_3$ );  $^{13}\text{C}$  NMR ( $\text{D}_2\text{O}$ , 100 MHz)  $\delta$  176.4, 74.2, 72.4, 71.0, 70.0, 46.9, 37.6, 31.6, 19.0, 12.8; HRMS  $m/z$  256.1159 [ $\text{M}+\text{Na}$ ]<sup>+</sup> (calcd for  $\text{C}_{10}\text{H}_{19}\text{NO}_5\text{Na}$ , 256.1161).

*N*-((1*S*,2*S*,3*S*,4*S*,5*R*)-2,3,4,5-tetrahydrocyclohexyl)hexanamide (**6**). White solid (52%).  $^1\text{H}$  NMR ( $\text{D}_2\text{O}$ , 400 MHz)  $\delta$  3.77 (br s, 1H, H-2), 3.68 (br d,  $J = 12.4$  Hz, 1H, H-1), 3.29-3.34 (m, 3H, H-3,4,5), 2.05 (t,  $J = 7.2$  Hz, 2H,  $-\text{OCCCH}_2-$ ), 1.68 (m, 1H, H-6), 1.53 (q,  $J = 12.0$  Hz, 1H, H-6), 1.38 (m, 2H,  $-\text{CH}_2-$ ), 1.08 (br s, 4H,  $-(\text{CH}_2)_2-$ ), 0.66 (t,  $J = 6.0$  Hz, 3H,  $-\text{CH}_3$ );  $^{13}\text{C}$  NMR ( $\text{CD}_3\text{OD}$ , 100 MHz)  $\delta$  174.2, 74.6, 73.1, 71.2, 70.3, 46.9, 35.5, 32.1, 31.0, 25.2, 22.0, 12.8; HRMS  $m/z$  262.1652 [ $\text{M}+\text{H}$ ]<sup>+</sup> (calcd for  $\text{C}_{12}\text{H}_{24}\text{NO}_5$ , 262.1654).

*N*-((1*S*,2*S*,3*S*,4*S*,5*R*)-2,3,4,5-tetrahydrocyclohexyl)decanamide (**7**). White solid (58%).  $[\alpha]_{\text{D}}^{20} = -20.8$  ( $c$  0.23,  $\text{CH}_3\text{OH}$ );  $^1\text{H}$  NMR ( $\text{CD}_3\text{OD}$ , 400 MHz)  $\delta$  3.77 (br s, 1H, H-2), 3.73 (m, 1H, H-1), 3.41 (dd,  $J = 9.6, 9.2$  Hz, 1H, H-4), 3.31 (m, 1H, H-5), 3.23 (m, 1H, H-3), 2.10 (t,  $J = 7.6$  Hz, 2H,  $-\text{OCCCH}_2-$ ), 1.66-1.73 (m, 2H, H-6), 1.48-1.52 (m, 2H,  $-\text{CH}_2-$ ), 1.20 (br s, 12H,  $-(\text{CH}_2)_6-$ ), 0.80 (t,  $J = 6.4$  Hz, 3H,  $-\text{CH}_3$ );  $^{13}\text{C}$  NMR ( $\text{CD}_3\text{OD}$ , 100 MHz)  $\delta$  175.7, 76.1, 74.6, 72.6, 71.8, 48.4, 37.0, 33.6, 33.1, 30.6, 30.5, 30.4, 30.3, 27.0, 23.7, 14.4; HRMS  $m/z$  318.2286 [ $\text{M}+\text{H}$ ]<sup>+</sup> (calcd for  $\text{C}_{16}\text{H}_{32}\text{NO}_5$ , 318.2280).

### General procedure for synthesis of *N*-acyl-aminoquercitols 8-13

To a stirred solution of aminocyclitol **2** or **3** (0.14 mmol) in  $\text{CH}_2\text{Cl}_2$  (1.4 mL) was added DMAP (trace amount) and TEA (1.09 mmol). After the clear solution obtained, anhydride compounds (0.41 mmol) were added slowly, and the mixture was stirred at room temperature for 3 h. The reaction mixture was extracted with  $\text{CH}_2\text{Cl}_2$  ( $3 \times 10$  mL), washed with brine, dried over anhydrous  $\text{Na}_2\text{SO}_4$ , filtered and concentrated under reduced pressure. The crude product was treated with 1.25 M methanolic HCl (0.7 mL) and stirred at room temperature for 4 h. The reaction mixture was evaporated under reduced pressure to give *N*-acyl aminoquercitols.

***N*-((1*S*,2*S*,3*S*,4*S*,5*R*)-2,3,4,5-tetrahydrocyclohexyl)dodecanamide (8)**. White solid (45%). <sup>1</sup>H NMR (CD<sub>3</sub>OD, 400 MHz) δ 3.77 (br s, 1H, H-2), 3.74 (m, 1H, H-1), 3.41 (dd, *J* = 9.2, 9.2 Hz, 1H, H-4), 3.32 (m, 1H, H-5), 3.24 (m, 1H, H-3), 2.11 (t, *J* = 7.6 Hz, 2H, -OCCH<sub>2</sub>-), 1.67-1.74 (m, 2H, H-6), 1.49-1.52 (m, 2H, -CH<sub>2</sub>-), 1.20 (br s, 16H, -(CH<sub>2</sub>)<sub>8</sub>-), 0.81 (t, *J* = 6.0 Hz, 3H, -CH<sub>3</sub>); <sup>13</sup>C NMR (CD<sub>3</sub>OD, 100 MHz) δ 175.7, 76.1, 74.6, 72.6, 71.8, 48.4, 37.0, 33.6, 33.1, 30.7, 30.6, 30.5, 30.4, 30.3, 27.0, 23.7, 14.4; HRMS *m/z* 368.2408 [M+Na]<sup>+</sup> (calcd for C<sub>18</sub>H<sub>35</sub>NO<sub>5</sub>Na, 368.2413).

***N*-((1*R*,2*S*,3*S*,4*S*,5*R*)-2,3,4,5-tetrahydrocyclohexyl)acetamide (9)**. Pale yellow oil (quantitative yield). <sup>1</sup>H NMR (D<sub>2</sub>O, 400 MHz) δ 3.82 (br s, 1H, H-1), 3.67 (br s, 1H, H-2), 3.48 (br s, 1H, H-5), 3.38 (br s, 2H, H-3,4), 1.74 (s, 3H, -CH<sub>3</sub>), 1.64 (m, 2H, H-6); <sup>13</sup>C NMR (D<sub>2</sub>O, 100 MHz) δ 174.0, 73.8, 71.3, 70.7, 69.2, 48.5, 30.9, 22.0; HRMS *m/z* 206.1024 [M+H]<sup>+</sup> (calcd for C<sub>8</sub>H<sub>16</sub>NO<sub>5</sub>, 206.1028).

***N*-((1*R*,2*S*,3*S*,4*S*,5*R*)-2,3,4,5-tetrahydrocyclohexyl)butyramide (10)**. Yellow solid (52%). <sup>1</sup>H NMR (D<sub>2</sub>O, 400 MHz) δ 3.89 (m, 1H, H-1), 3.72 (br s, 1H, H-1), 3.52 (m, 1H, H-5), 3.43 (m, 2H, H-3,4), 2.02 (t, *J* = 7.2 Hz, 2H, -OCCH<sub>2</sub>-), 1.70 (m, 2H, H-6), 1.34-1.43 (m, 2H, -CH<sub>2</sub>-), 0.68 (t, *J* = 7.6 Hz, 3H, -CH<sub>3</sub>); <sup>13</sup>C NMR ((D<sub>2</sub>O, 100 MHz) δ 177.0, 73.7, 71.3, 70.6, 69.2, 48.4, 37.4, 30.8, 19.2, 12.6; HRMS *m/z* 234.1333 [M+H]<sup>+</sup> (calcd for C<sub>10</sub>H<sub>20</sub>NO<sub>5</sub>, 234.1341).

***N*-((1*R*,2*S*,3*S*,4*S*,5*R*)-2,3,4,5-tetrahydrocyclohexyl)hexanamide (11)**. Yellow oil (quantitative yield). <sup>1</sup>H NMR (D<sub>2</sub>O, 400 MHz) δ 3.87 (br d, *J* = 3.6 Hz, 1H, H-1), 3.71 (br s, 1H, H-2), 3.51 (m, 1H, H-5), 3.41 (br d, *J* = 5.2 Hz, 2H, H-3,4), 2.03 (t, *J* = 7.2 Hz, 2H, -OCCH<sub>2</sub>-), 1.68-1.71 (m, 2H, H-6), 1.33-1.40 (m, 2H, -CH<sub>2</sub>-), 1.02-1.12 (m, 4H, -(CH<sub>2</sub>)<sub>2</sub>-), 0.64 (t, *J* = 6.8 Hz, 3H, -CH<sub>3</sub>); <sup>13</sup>C NMR (D<sub>2</sub>O + one drop of acetone-*d*<sub>6</sub>, 100 MHz) δ 177.0, 73.6, 71.1, 70.5, 69.0, 48.2, 35.3, 30.7, 30.3, 25.0, 21.5, 13.1; HRMS *m/z* 262.1650 [M+H]<sup>+</sup> (calcd for C<sub>12</sub>H<sub>24</sub>NO<sub>5</sub>, 262.1654).

***N*-((1*R*,2*S*,3*S*,4*S*,5*R*)-2,3,4,5-tetrahydrocyclohexyl)decanamide (12)**. White solid (83%). <sup>1</sup>H NMR (CD<sub>3</sub>OD, 400 MHz) δ 4.04 (m, 1H, H-1), 3.71 (m, 1H, H-2), 3.55-3.61 (m, 2H, H-4,5), 3.49 (m, 1H, H-3), 2.11 (t, *J* = 7.2 Hz, 2H, -OCCH<sub>2</sub>-), 1.85 (m, 1H, H-6), 1.68 (m, 1H, H-6), 1.50 (br s, 2H, -CH<sub>2</sub>-), 1.20 (br s, 12H, -(CH<sub>2</sub>)<sub>6</sub>-), 0.80 (t, *J* = 6.8 Hz, 3H, -CH<sub>3</sub>); <sup>13</sup>C NMR (CD<sub>3</sub>OD, 100 MHz) δ 174.9, 73.5, 72.4, 71.0, 69.6, 47.6, 36.5, 31.7, 31.6, 29.2, 29.1, 29.0, 28.9, 25.7, 22.3, 13.0; HRMS *m/z* 318.2271 [M+H]<sup>+</sup> (calcd for C<sub>16</sub>H<sub>32</sub>NO<sub>5</sub>, 318.2280).

***N*-((1*R*,2*S*,3*S*,4*S*,5*R*)-2,3,4,5-tetrahydrocyclohexyl)dodecanamide (13)**. White solid (quantitative yield). <sup>1</sup>H NMR (CD<sub>3</sub>OD, 400 MHz) δ 4.03 (m, 1H, H-1), 3.71 (m, 1H, H-2), 3.55-3.61 (m, 2H, H-4,5), 3.49 (m, 1H, H-3), 2.11 (t, *J* = 6.8 Hz, 2H, -OCCH<sub>2</sub>-), 1.83 (m, 1H, H-6), 1.69 (m, 1H, H-6), 1.50 (br s, 2H, -CH<sub>2</sub>-), 1.19 (br s, 16H, -(CH<sub>2</sub>)<sub>8</sub>-), 0.80 (t, *J* = 6.4 Hz, 3H, -CH<sub>3</sub>); <sup>13</sup>C NMR (CD<sub>3</sub>OD, 100 MHz) δ 176.4, 74.9, 73.9, 72.5, 71.2, 48.4, 37.0, 33.2, 33.1, 30.7, 30.7, 30.6, 30.5, 30.4, 30.3, 27.1, 23.7, 14.4; HRMS *m/z* 368.2403 [M+Na]<sup>+</sup> (calcd for C<sub>18</sub>H<sub>35</sub>NNaO<sub>5</sub>, 368.2413).

### General procedure for reductive amination of aminocyclitols 2-3

#### Using AcOH

To a solution of aminocyclitols **2** or **3** (0.12 mmol) in methanol (1.1 mL) under an atmosphere of N<sub>2</sub> were treated with sodium cyanoborohydride (0.22 mmol), acetic acid (8 μL) and corresponding aldehyde (0.11 mmol). After stirring at room temperature for 2 days, the reaction mixture was evaporated to dryness, quenched with water and extracted with EtOAc (3×10 mL). The combined organic layers were washed with brine, dried over anhydrous Na<sub>2</sub>SO<sub>4</sub> and concentrated under reduced pressure to afford crude product, which was purified by flash chromatography or sephadex LH-20 column chromatography.

#### Using Ti(O<sup>*i*</sup>Pr)<sub>4</sub>

To a solution of aminocyclitols **2** or **3** (0.16 mmol) in methanol (1.6 mL) under an atmosphere of N<sub>2</sub> were treated with corresponding aldehyde (0.19 mmol), titanium isopropoxide (0.20 mmol) and sodium cyanoborohydride (0.40 mmol). After stirring at 0 °C for 1 day, the reaction mixture was evaporated to dryness, quenched with water and extracted with EtOAc (3×10 mL). The combined organic layers were washed with brine, dried over anhydrous Na<sub>2</sub>SO<sub>4</sub> and concentrated under reduced pressure to afford crude product, which was purified by flash chromatography or sephadex LH-20 column chromatography.

**(1*S*,2*S*,3*S*,4*S*,5*R*)-(2,3,4,5-di-*O*-isopropylidene)-*N*-ethylcyclohexylamine (14)**. White solid (29%), (5% MeOH-EtOAc for flash column). <sup>1</sup>H NMR (CDCl<sub>3</sub>, 400 MHz) δ 4.37 (dd, *J* = 6.0, 4.4 Hz, 1H), 4.08 (dd, *J* = 8.8, 4.8 Hz, 1H), 3.47 (dd, *J* = 10.4, 8.8 Hz, 1H), 3.22 (m, 1H), 3.04 (m, 1H), 2.72 (q, *J* = 7.2 Hz, 2H), 2.33 (m, 1H), 1.50 (m, 1H), 1.47 (s, 3H), 1.36 (s, 3H), 1.34 (s, 3H), 1.30 (s, 3H), 1.10 (t, *J* = 7.2 Hz, 3H); <sup>13</sup>C NMR (CDCl<sub>3</sub>, 100 MHz) δ 111.0, 109.4, 82.4, 76.6, 75.1, 74.4, 54.7, 41.0, 30.5, 28.6, 26.9, 26.9, 26.2, 14.8.

**(1*S*,2*S*,3*S*,4*S*,5*R*)-(2,3:4,5-di-*O*-isopropylidene)-*N*-butylcyclohexylamine (15).** White solid (34%), (100% EtOAc for flash column). <sup>1</sup>H NMR (CDCl<sub>3</sub>, 400 MHz) δ 4.36 (dd, *J* = 5.2, 4.4 Hz, 1H), 4.07 (dd, *J* = 8.4, 4.8 Hz, 1H), 3.49 (dd, *J* = 10.4, 8.8 Hz, 1H), 3.23 (m, 1H), 2.97 (m, 1H), 2.62-2.66 (m, 2H), 2.30 (m, 1H), 1.50 (m, 1H), 1.47 (s, 3H), 1.41-1.45 (m, 4H), 1.36 (s, 3H), 1.34 (s, 3H), 1.31 (s, 3H), 0.86 (t, *J* = 7.6 Hz, 3H); <sup>13</sup>C NMR (CDCl<sub>3</sub>, 100 MHz) δ 109.9, 108.4, 81.4, 75.6, 74.3, 73.4, 54.2, 45.8, 31.1, 29.8, 27.6, 25.9, 25.9, 25.2, 19.4, 12.9.

**(1*S*,2*S*,3*S*,4*S*,5*R*)-(2,3:4,5-di-*O*-isopropylidene)-*N*-hexylcyclohexylamine (16).** Colorless oil (51%), (100% EtOAc for flash column). <sup>1</sup>H NMR (CDCl<sub>3</sub>, 400 MHz) δ 4.38 (dd, *J* = 5.6, 4.4 Hz, 1H), 4.08 (dd, *J* = 8.4, 4.8 Hz, 1H), 3.47 (dd, *J* = 10.0, 8.4 Hz, 1H), 3.22 (m, 1H), 3.08 (m, 1H), 2.67 (t, *J* = 7.2 Hz, 2H), 2.33 (m, 1H), 1.54 (m, 1H), 1.46-1.51 (m, 2H), 1.46 (s, 3H), 1.36 (s, 3H), 1.34 (s, 3H), 1.30 (s, 3H), 1.23 (br s, 6H), 0.82 (t, *J* = 6.8 Hz, 3H); <sup>13</sup>C NMR (CDCl<sub>3</sub>, 100 MHz) δ 111.0, 109.5, 82.3, 76.5, 74.7, 74.2, 54.5, 46.5, 31.5, 30.1, 29.1, 28.5, 26.9, 26.9, 26.8, 26.2, 22.5, 14.0.

**(1*S*,2*S*,3*S*,4*S*,5*R*)-(2,3:4,5-di-*O*-isopropylidene)-*N*-decylcyclohexylamine (17).** Pale yellow oil (60%), (80% EtOAc-hexane for flash column). <sup>1</sup>H NMR (CDCl<sub>3</sub>, 400 MHz) δ 4.34 (dd, *J* = 4.4, 4.4 Hz, 1H), 4.06 (dd, *J* = 8.4, 4.4 Hz, 1H), 3.49 (dd, *J* = 8.4, 8.4 Hz, 1H), 3.23 (m, 1H), 2.93 (m, 1H), 2.58-2.61 (m, 2H), 2.28 (m, 1H), 1.46 (s, 3H), 1.42-1.45 (m, 3H), 1.36 (s, 3H), 1.34 (s, 3H), 1.30 (s, 3H), 1.19 (br s, 14H), 0.81 (t, *J* = 6.4 Hz, 3H); <sup>13</sup>C NMR (CDCl<sub>3</sub>, 100 MHz) δ 110.8, 109.2, 82.4, 75.6, 75.5, 74.5, 55.2, 47.2, 31.9, 31.0, 30.2, 29.6, 29.6, 29.5, 29.3, 28.6, 27.3, 26.9, 26.9, 26.2, 22.7, 14.1.

**(1*S*,2*S*,3*S*,4*S*,5*R*)-(2,3:4,5-di-*O*-isopropylidene)-*N*-dodecylcyclohexylamine (18).** Pale yellow oil (50%), (80% EtOAc-hexane for flash column). <sup>1</sup>H NMR (CDCl<sub>3</sub>, 400 MHz) δ 4.36 (br s, 1H), 4.07 (m, 1H), 3.48 (dd, *J* = 8.8, 8.8 Hz, 1H), 3.23 (m, 1H), 2.98 (m, 1H), 2.63 (t, *J* = 7.6 Hz, 2H), 2.31 (m, 1H), 1.52-1.55 (m, 3H), 1.47 (s, 3H), 1.36 (s, 3H), 1.34 (s, 3H), 1.31 (s, 3H), 1.19 (br s, 18H), 0.81 (t, *J* = 6.4 Hz, 3H); <sup>13</sup>C NMR (CDCl<sub>3</sub>, 100 MHz) δ 109.0, 108.4, 81.4, 75.6, 74.3, 73.4, 54.1, 46.1, 30.9, 29.7, 28.9, 28.6, 28.6, 28.6, 28.5, 28.4, 28.3, 27.6, 26.3, 25.9, 25.9, 25.2, 21.7, 13.1.

**(1*R*,2*S*,3*S*,4*S*,5*R*)-(2,3:4,5-di-*O*-isopropylidene)-*N*-butylcyclohexylamine (19).** Pale yellow oil (14%), (100% EtOAc for flash column). <sup>1</sup>H NMR (CDCl<sub>3</sub>, 400 MHz) δ 4.24 (dd, *J* = 7.6, 6.8 Hz, 1H), 4.07 (dd, *J* = 8.0, 7.2 Hz, 1H), 3.65-3.68 (m, 2H), 3.02 (dt, *J* = 8.0, 7.6 Hz, 1H), 2.59 (m, 1H), 2.47 (m, 1H), 1.93 (m, 1H), 1.84 (m, 1H), 1.43 (s, 3H), 1.38-1.40 (m, 2H), 1.36 (s, 3H), 1.35 (s, 3H), 1.26-1.32 (m, 2H), 1.28 (s, 3H), 0.85 (t, *J* = 7.6 Hz, 3H); <sup>13</sup>C NMR (CDCl<sub>3</sub>, 100 MHz) δ 111.6, 109.9, 80.5, 78.8, 76.2, 72.6, 55.9, 47.3, 32.1, 30.2, 27.8, 27.1, 27.0, 25.2, 20.4, 13.9.

**(1*R*,2*S*,3*S*,4*S*,5*R*)-(2,3:4,5-di-*O*-isopropylidene)-*N*-hexylcyclohexylamine (20).** Colorless oil (54%), (80% EtOAc-hexane for flash column). <sup>1</sup>H NMR (CDCl<sub>3</sub>, 400 MHz) δ 4.24 (dd, *J* = 6.8, 6.8 Hz, 1H), 4.07 (dd, *J* = 7.2, 7.2 Hz, 1H), 3.65-3.70 (m, 2H), 3.02 (q, *J* = 7.2 Hz, 1H), 2.59 (m, 1H), 2.46 (m, 1H), 1.81-1.97 (m, 4H), 1.43 (s, 3H), 1.36 (s, 3H), 1.35 (s, 3H), 1.28 (s, 3H), 1.18-1.22 (m, 6H), 0.82 (t, *J* = 6.4 Hz, 3H); <sup>13</sup>C NMR (CDCl<sub>3</sub>, 100 MHz) δ 111.6, 109.9, 80.5, 78.7, 76.2, 72.6, 55.8, 47.6, 31.7, 30.2, 29.9, 27.8, 27.2, 27.0, 26.9, 25.2, 22.6, 14.0.

**(1*R*,2*S*,3*S*,4*S*,5*R*)-(2,3:4,5-di-*O*-isopropylidene)-*N*-decylcyclohexylamine (21).** Colorless oil (67%), (80% EtOAc-hexane for flash column). <sup>1</sup>H NMR (CDCl<sub>3</sub>, 400 MHz) δ 4.24 (dd, *J* = 8.0, 6.8 Hz, 1H), 4.07 (dd, *J* = 8.0, 6.8 Hz, 1H), 3.66-3.67 (m, 2H), 3.02 (ddd, *J* = 8.0, 7.6, 6.8 Hz, 1H), 2.58 (m, 1H), 2.47 (m, 1H), 1.94 (br s, 1H), 1.85 (m, 1H), 1.43 (s, 3H), 1.36 (s, 3H), 1.35 (s, 3H), 1.28 (s, 3H), 1.19 (br s, 16H), 0.81 (t, *J* = 6.8 Hz, 3H); <sup>13</sup>C NMR (CDCl<sub>3</sub>, 100 MHz) δ 111.6, 109.9, 80.4, 78.7, 76.2, 72.6, 55.8, 47.6, 31.9, 30.2, 29.9, 29.6, 29.5, 29.4, 29.3, 27.8, 27.2, 27.1, 27.0, 25.2, 22.7, 14.1.

**(1*R*,2*S*,3*S*,4*S*,5*R*)-(2,3:4,5-di-*O*-isopropylidene)-*N*-dodecylcyclohexylamine (22).** Colorless oil (32%), (80% EtOAc-hexane for flash column). <sup>1</sup>H NMR (CDCl<sub>3</sub>, 400 MHz) δ 4.24 (dd, *J* = 8.0, 5.6 Hz, 1H), 4.08 (dd, *J* = 8.0, 7.2 Hz, 1H), 3.67 (br d, *J* = 4.8 Hz, 2H), 3.01 (ddd, *J* = 8.0, 8.0, 7.2 Hz, 1H), 2.60 (m, 1H), 2.47 (m, 1H), 1.93 (m, 1H), 1.86 (m, 1H), 1.42 (s, 3H), 1.36 (s, 3H), 1.35 (s, 3H), 1.28 (s, 3H), 1.19 (br s, 20H), 0.81 (t, *J* = 8.0 Hz, 3H); <sup>13</sup>C NMR (CDCl<sub>3</sub>, 100 MHz) δ 111.6, 109.9, 80.5, 78.7, 76.2, 72.6, 55.8, 47.6, 31.9, 30.2, 29.9, 29.6, 29.6, 29.6, 29.6, 29.5, 29.3, 27.8, 27.2, 27.1, 27.0, 25.2, 22.7, 14.1.

**(1*S*,2*S*,3*S*,4*S*,5*R*)-(2,3:4,5-di-*O*-isopropylidene)-*N,N*-diethylcyclohexylamine (23).** Colorless oil (48%), (100% EtOAc for flash column). <sup>1</sup>H NMR (CDCl<sub>3</sub>, 400 MHz) δ 4.30 (dd, *J* = 4.4, 4.4 Hz, 1H), 4.03 (dd, *J* = 8.8, 4.4 Hz, 1H), 3.47 (dd, *J* = 9.6, 8.8 Hz, 1H), 3.24 (ddd, *J* = 11.6, 9.6, 3.2 Hz, 1H), 2.92 (dt, *J* = 12.0, 4.0 Hz, 1H), 2.69-2.77 (m, 2H), 2.52-2.60 (m, 2H), 2.11 (ddd, *J* = 11.6, 4.0, 4.0 Hz, 1H), 1.74 (m, 1H), 1.47 (s, 3H), 1.37 (s, 3H), 1.35 (s, 3H), 1.29 (s, 3H), 0.98 (t, *J* = 6.8 Hz, 6H); <sup>13</sup>C NMR (CDCl<sub>3</sub>, 100 MHz) δ 110.8, 109.7, 82.5, 77.3, 76.7, 75.3, 57.4, 45.1, 28.9, 27.0, 26.9, 26.4, 26.3, 13.5.

**(1S,2S,3S,4S,5R)-(2,3,4,5-di-O-isopropylidene)-N,N-dibutylcyclohexylamine (24)**. Yellow oil (51%), (1:4:5 MeOH-CH<sub>2</sub>Cl<sub>2</sub>-hexane for sephadex LH-20 column). <sup>1</sup>H NMR (CDCl<sub>3</sub>, 400 MHz) δ 4.27 (br s, 1H), 3.99 (dd, *J* = 8.8, 4.8 Hz, 1H), 3.46 (dd, *J* = 10.0, 8.8 Hz, 1H), 3.22 (m, 1H), 2.89 (br d, *J* = 10.8 Hz, 1H), 2.59-2.66 (m, 2H), 2.41-2.44 (m, 2H), 2.07 (br d, *J* = 10.8 Hz, 1H), 1.74 (ddd, *J* = 12.4, 12.4, 11.6 Hz, 1H), 1.45 (s, 3H), 1.36 (s, 3H), 1.34 (s, 3H), 1.28 (s, 3H), 1.19-1.26 (m, 8H), 0.84 (t, *J* = 7.2 Hz, 6H); <sup>13</sup>C NMR (CDCl<sub>3</sub>, 100 MHz) δ 109.8, 108.6, 81.6, 76.6, 75.6, 74.3, 56.7, 50.7, 29.9, 27.9, 25.9, 25.9, 25.1, 24.7, 19.4, 13.1.

**(1S,2S,3S,4S,5R)-(2,3,4,5-di-O-isopropylidene)-N,N-dihexylcyclohexylamine (25)**. Pale yellow oil (38%), (0.5:2.5:7 MeOH-CH<sub>2</sub>Cl<sub>2</sub>-hexane for sephadex LH-20 column). <sup>1</sup>H NMR (CDCl<sub>3</sub>, 400 MHz) δ 4.27 (br s, 1H), 4.00 (dd, *J* = 8.0, 4.8 Hz, 1H), 3.46 (dd, *J* = 9.2, 9.2 Hz, 1H), 3.23 (m, 1H), 2.88 (br d, *J* = 11.2 Hz, 1H), 2.57-2.64 (m, 2H), 2.36-2.44 (m, 2H), 2.08 (br d, *J* = 11.6 Hz, 1H), 1.73 (m, 1H), 1.46 (s, 3H), 1.36 (s, 3H), 1.34 (s, 3H), 1.28 (s, 3H), 1.20 (br s, 16H), 0.82 (t, *J* = 6.8 Hz, 6H); <sup>13</sup>C NMR (CDCl<sub>3</sub>, 100 MHz) δ 110.8, 109.6, 82.6, 77.6, 76.6, 75.4, 57.8, 52.1, 31.8, 28.9, 28.7, 27.0, 26.9, 26.9, 26.1, 25.8, 22.7, 14.1.

**(1R,2S,3S,4S,5R)-(2,3,4,5-di-O-isopropylidene)-N,N-diethylcyclohexylamine (26)**. Colorless oil (45%), (1:7:2 MeOH-CH<sub>2</sub>Cl<sub>2</sub>-hexane for sephadex LH-20 column). <sup>1</sup>H NMR (CDCl<sub>3</sub>, 400 MHz) δ 4.29 (dd, *J* = 10.0, 7.2 Hz, 1H), 4.18 (dd, *J* = 8.4, 7.2 Hz, 1H), 3.63 (dd, *J* = 10.4, 8.4 Hz, 1H), 3.54 (dt, *J* = 10.4, 7.2 Hz, 1H), 3.25 (ddd, *J* = 10.0, 8.8, 7.2 Hz, 1H), 2.45-2.60 (m, 4H), 1.99 (m, 1H), 1.75 (m, 1H), 1.44 (s, 3H), 1.37 (s, 3H), 1.35 (s, 3H), 1.26 (s, 3H), 1.02 (t, *J* = 5.6 Hz, 6H); <sup>13</sup>C NMR (CDCl<sub>3</sub>, 100 MHz) δ 112.1, 109.5, 80.4, 76.5, 76.1, 73.5, 57.7, 44.5, 27.4, 27.2, 27.1, 26.2, 24.5, 14.0.

**(1R,2S,3S,4S,5R)-(2,3,4,5-di-O-isopropylidene)-N,N-dibutylcyclohexylamine (27)**. White solid (57%), (80% EtOAc-hexane for flash column). <sup>1</sup>H NMR (CDCl<sub>3</sub>, 400 MHz) δ 4.27 (dd, *J* = 9.6, 8.4 Hz, 1H), 4.17 (dd, *J* = 8.4, 7.2 Hz, 1H), 3.63 (dd, *J* = 10.8, 7.2 Hz, 1H), 3.54 (dd, *J* = 10.8, 8.0 Hz, 1H), 3.19 (ddd, *J* = 9.6, 9.2, 8.4 Hz, 1H), 2.44-2.51 (m, 2H), 2.33-2.40 (m, 2H), 1.94 (m, 1H), 1.74 (m, 1H), 1.43 (s, 3H), 1.36 (s, 3H), 1.35 (s, 3H), 1.26 (s, 3H), 1.18-1.24 (m, 8H), 0.84 (t, *J* = 7.2 Hz, 6H); <sup>13</sup>C NMR (CDCl<sub>3</sub>, 100 MHz) δ 111.0, 108.4, 79.4, 75.4, 75.1, 72.5, 56.8, 49.9, 30.1, 26.4, 26.2, 26.1, 25.4, 23.7, 19.5, 13.1.

**(1R,2S,3S,4S,5R)-(2,3,4,5-di-O-isopropylidene)-N,N-dihexylcyclohexylamine (28)**. Pale yellow oil (91%), (1:4:5 MeOH-CH<sub>2</sub>Cl<sub>2</sub>-hexane for sephadex LH-20 column). <sup>1</sup>H NMR (CDCl<sub>3</sub>, 400 MHz) δ 4.26 (dd, *J* = 10.0, 8.4 Hz, 1H), 4.16 (dd, *J* = 8.4, 7.6 Hz, 1H), 3.63 (dd, *J* = 10.0, 7.6 Hz, 1H), 3.54 (dd, *J* = 10.8, 7.6 Hz, 1H), 3.19 (dd, *J* = 16.0, 10.0 Hz, 1H), 2.42-2.49 (m, 2H), 2.32-2.39 (m, 2H), 1.93 (m, 1H), 1.73 (m, 1H), 1.43 (s, 3H), 1.37 (s, 3H), 1.35 (s, 3H), 1.26 (s, 3H), 1.21-1.24 (br s, 16H), 0.81 (t, *J* = 7.6 Hz, 6H); <sup>13</sup>C NMR (CDCl<sub>3</sub>, 100 MHz) δ 112.0, 109.4, 80.4, 76.5, 76.2, 73.5, 57.9, 56.3, 31.8, 28.9, 27.4, 27.2, 27.1, 27.1, 26.4, 24.6, 22.7, 14.1.

#### General procedure for deprotection of compounds 14-28

##### For the synthesis of *N*-alkyl-aminocyclitols 29-31, 34-35, and 38-43

To a solution of the protected *N*-alkyl aminoquercitols (0.05 mmol) in 1.25 M methanolic HCl (1 mL) were stirred at room temperature for 4 h. The reaction mixture was evaporated to dryness, redissolved in H<sub>2</sub>O, loaded onto Dowex 50W-X8 (H<sup>+</sup>) column and eluted with H<sub>2</sub>O followed by 50% NH<sub>3</sub>-H<sub>2</sub>O. Fractions eluted with 50% NH<sub>3</sub>-H<sub>2</sub>O were evaporated to give the *N*-alkyl aminoquercitols.

##### For the synthesis of *N*-alkyl-aminocyclitols 32-33 and 36-37

To a solution of the protected *N*-alkyl aminoquercitols (0.08 mmol) in 1.25 M methanolic HCl (1 mL) were stirred at room temperature for 4 h. The reaction mixture was evaporated to dryness, redissolved in H<sub>2</sub>O and extracted with EtOAc (3×10 mL). The combined aqueous layers were neutralized with 1 M NaHCO<sub>3</sub> and further extracted with EtOAc. The combined organic layers were evaporated under reduced pressure to afford the *N*-alkyl aminoquercitols.

**(1S,2S,3S,4S,5R)-1-ethylamino-cyclohexane-2,3,4,5-tetraol (29)**. Yellow oil (80%). <sup>1</sup>H NMR (D<sub>2</sub>O, 400 MHz) δ 3.96 (br s, 1H, H-2), 3.33-3.35 (m, 2H, H-4,5), 3.25 (m, 1H, H-3), 2.90 (br d, *J* = 12.4 Hz, 1H, H-1), 2.68-2.75 (m, 2H, -HNCH<sub>2</sub>-), 1.88 (m, 1H, H-6), 1.48 (m, 1H, H-6), 0.99 (t, *J* = 7.2 Hz, 3H, -CH<sub>3</sub>); <sup>13</sup>C NMR (D<sub>2</sub>O, 100 MHz) δ 74.1, 72.3, 69.6, 68.5, 53.4, 40.1, 30.5, 11.9; HRMS *m/z* 192.1239 [M+H]<sup>+</sup> (calcd for C<sub>8</sub>H<sub>18</sub>NO<sub>4</sub>, 192.1236).

**(1S,2S,3S,4S,5R)-1-butylamino-cyclohexane-2,3,4,5-tetraol (30)**. Pale yellow oil (quantitative yield). <sup>1</sup>H NMR (D<sub>2</sub>O, 400 MHz) δ 4.04 (br s, 1H, H-2), 3.44-3.46 (m, 2H, H-4,5), 3.36 (m, 1H, H-3), 2.49-2.68 (m, 3H, H-1, -HNCH<sub>2</sub>-), 1.92 (br d, *J* = 12.4 Hz, 1H, H-6), 1.35-1.45 (m, 3H, H-6, -CH<sub>2</sub>-), 1.21-1.28 (m, 2H, -CH<sub>2</sub>CH<sub>3</sub>), 0.83 (t, *J* = 7.6 Hz, 3H, -CH<sub>3</sub>); <sup>13</sup>C NMR (D<sub>2</sub>O, 100 MHz) δ 74.5, 72.9, 70.2, 69.6, 53.1, 45.1, 32.1, 30.7, 19.8, 13.2; HRMS *m/z* 220.1548 [M+H]<sup>+</sup> (calcd for C<sub>10</sub>H<sub>22</sub>NO<sub>4</sub>, 220.1549).

**(1S,2S,3S,4S,5R)-1-hexylamino-cyclohexane-2,3,4,5-tetraol (31).** Pale yellow solid (59%). <sup>1</sup>H NMR (D<sub>2</sub>O, 400 MHz) δ 3.94 (br s, 1H, H-2), 3.32-3.34 (m, 2H, H-4,5), 3.24 (m, 1H, H-3), 2.73 (d, *J* = 11.6 Hz, 1H, H-1), 2.50-2.59 (m, 2H, -HNCH<sub>2</sub>-), 1.85 (m, 1H, H-6), 1.34-1.41 (m, 3H, H-6, -CH<sub>2</sub>-), 1.10 (br s, 6H, -(CH<sub>2</sub>)<sub>3</sub>-), 0.67 (br s, 3H, -CH<sub>3</sub>); <sup>13</sup>C NMR (D<sub>2</sub>O, 100 MHz) δ 74.3, 72.6, 69.9, 69.0, 53.5, 45.4, 31.2, 30.8, 27.5, 26.0, 21.9, 13.3; HRMS *m/z* 248.1854 [M+H]<sup>+</sup> (calcd for C<sub>12</sub>H<sub>26</sub>NO<sub>4</sub>, 248.1862).

**(1S,2S,3S,4S,5R)-1-decylamino-cyclohexane-2,3,4,5-tetraol (32).** White solid (quantitative yield). <sup>1</sup>H NMR (CD<sub>3</sub>OD, 400 MHz) δ 3.91 (br s, 1H, H-2), 3.41 (dd, *J* = 9.2, 9.2 Hz, 1H, H-4), 3.27 (m, 1H, H-5), 3.16 (m, 1H, H-3), 2.44-2.57 (m, 3H, H-1, -HNCH<sub>2</sub>-), 1.81 (m, 1H, H-6), 1.40-1.52 (m, 3H, H-6, -CH<sub>2</sub>-), 1.20 (br s, 14H, -(CH<sub>2</sub>)<sub>7</sub>-), 0.80 (t, *J* = 6.4 Hz, 3H, -CH<sub>3</sub>); <sup>13</sup>C NMR (CD<sub>3</sub>OD, 100 MHz) δ 76.4, 75.1, 72.1, 70.9, 55.6, 47.4, 34.3, 33.1, 30.8, 30.7, 30.7, 30.6, 30.4, 28.5, 23.7, 14.4; HRMS *m/z* 304.2489 [M+H]<sup>+</sup> (calcd for C<sub>16</sub>H<sub>34</sub>NO<sub>4</sub>, 304.2488).

**(1S,2S,3S,4S,5R)-1-dodecylamino-cyclohexane-2,3,4,5-tetraol (33).** White solid (75%). <sup>1</sup>H NMR (CD<sub>3</sub>OD, 400 MHz) δ 3.91 (br s, 1H, H-2), 3.41 (dd, *J* = 9.2, 9.2 Hz, 1H, H-4), 3.27 (m, 1H, H-5), 3.16 (dd, *J* = 9.6, 2.4 Hz, 1H, H-3), 2.43-2.58 (m, 3H, H-1, -HNCH<sub>2</sub>-), 1.82 (m, 1H, H-6), 1.40-1.49 (m, 3H, H-6, -CH<sub>2</sub>-), 1.19 (br s, 18H, -(CH<sub>2</sub>)<sub>9</sub>-), 0.80 (t, *J* = 6.0 Hz, 3H, -CH<sub>3</sub>); <sup>13</sup>C NMR (CD<sub>3</sub>OD, 100 MHz) δ 76.3, 75.1, 72.1, 70.9, 55.6, 47.4, 34.2, 33.1, 30.8, 30.7, 30.7, 30.7, 30.6, 30.5, 28.5, 23.7, 14.4; HRMS *m/z* 332.2804 [M+H]<sup>+</sup> (calcd for C<sub>18</sub>H<sub>38</sub>NO<sub>4</sub>, 332.2801).

**(1R,2S,3S,4S,5R)-1-butylamino-cyclohexane-2,3,4,5-tetraol (34).** Pale yellow oil (97%). <sup>1</sup>H NMR (D<sub>2</sub>O, 400 MHz) δ 3.78 (br s, 1H, H-2), 3.51-3.63 (m, 3H, H-3,4,5), 2.98 (br d, *J* = 4.4 Hz, 1H, H-1), 2.55-2.63 (m, 2H, -HNCH<sub>2</sub>-), 1.76 (br s, 2H, H-6), 1.32-1.36 (m, 2H, -CH<sub>2</sub>-), 1.13-1.18 (m, 2H, -CH<sub>2</sub>CH<sub>3</sub>), 0.72 (t, *J* = 7.2 Hz, 3H, -CH<sub>3</sub>); <sup>13</sup>C NMR (D<sub>2</sub>O, 100 MHz) δ 73.4, 71.8, 70.2, 69.1, 55.4, 46.2, 30.1, 29.7, 19.7, 13.1; HRMS *m/z* 220.1545 [M+H]<sup>+</sup> (calcd for C<sub>10</sub>H<sub>22</sub>NO<sub>4</sub>, 220.1549).

**(1R,2S,3S,4S,5R)-1-hexylamino-cyclohexane-2,3,4,5-tetraol (35).** White solid (85%). [α]<sub>D</sub><sup>20</sup> = +31.6 (*c* 0.31, H<sub>2</sub>O); <sup>1</sup>H NMR (D<sub>2</sub>O, 400 MHz) δ 3.79 (m, 1H, H-2), 3.52-3.65 (m, 3H, H-3,4,5), 3.01 (br d, *J* = 4.8 Hz, 1H, H-1), 2.57-2.65 (m, 2H, -HNCH<sub>2</sub>-), 1.75-1.81 (m, 2H, H-6), 1.37 (br s, 2H, -CH<sub>2</sub>-), 1.12 (br s, 6H, -(CH<sub>2</sub>)<sub>3</sub>-), 0.68 (br t, *J* = 6.8 Hz, 3H, -CH<sub>3</sub>); <sup>13</sup>C NMR (D<sub>2</sub>O, 100 MHz) δ 73.1, 71.7, 70.0, 68.9, 55.3, 46.4, 30.7, 29.9, 27.3, 25.9, 21.9, 13.3; HRMS *m/z* 248.1858 [M+H]<sup>+</sup> (calcd for C<sub>12</sub>H<sub>26</sub>NO<sub>4</sub>, 248.1862).

**(1R,2S,3S,4S,5R)-1-decylamino-cyclohexane-2,3,4,5-tetraol (36).** White solid (88%). <sup>1</sup>H NMR (CD<sub>3</sub>OD, 400 MHz) δ 3.62-3.72 (m, 4H, H-2,3,4,5), 2.90 (br d, *J* = 4.4 Hz, 1H, H-1), 2.60 (m, 1H, -HNCH<sub>2</sub>-), 2.48 (m, 1H, -HNCH<sub>2</sub>-), 1.83 (m, 1H, H-6), 1.70 (m, 1H, H-6), 1.41-1.44 (m, 2H, -CH<sub>2</sub>-), 1.20 (br s, 14H, -(CH<sub>2</sub>)<sub>7</sub>-), 0.80 (t, *J* = 7.2 Hz, 3H, -CH<sub>3</sub>); <sup>13</sup>C NMR (CD<sub>3</sub>OD, 100 MHz) δ 74.9, 74.2, 72.6, 71.2, 56.6, 48.4, 33.0, 32.6, 30.7, 30.7, 30.6, 30.5, 30.4, 28.4, 23.7, 14.4; HRMS *m/z* 304.2476 [M+H]<sup>+</sup> (calcd for C<sub>16</sub>H<sub>34</sub>NO<sub>4</sub>, 304.2488).

**(1R,2S,3S,4S,5R)-1-dodecylamino-cyclohexane-2,3,4,5-tetraol (37).** White solid (52%). <sup>1</sup>H NMR (CD<sub>3</sub>OD, 400 MHz) δ 3.60-3.69 (m, 4H, H-2,3,4,5), 2.88 (br d, *J* = 3.2 Hz, 1H, H-1), 2.58 (m, 1H, -HNCH<sub>2</sub>-), 2.46 (m, 1H, -HNCH<sub>2</sub>-), 1.81 (m, 1H, H-6), 1.69 (m, 1H, H-6), 1.40-1.43 (m, 2H, -CH<sub>2</sub>-), 1.19 (br s, 18H, -(CH<sub>2</sub>)<sub>9</sub>-), 0.80 (t, *J* = 6.0 Hz, 3H, -CH<sub>3</sub>); <sup>13</sup>C NMR (CD<sub>3</sub>OD, 100 MHz) δ 74.9, 74.2, 72.7, 71.2, 56.5, 48.5, 33.1, 32.7, 30.8, 30.7, 30.7, 30.7, 30.6, 30.6, 30.5, 28.5, 23.7, 14.4; HRMS *m/z* 332.2799 [M+H]<sup>+</sup> (calcd for C<sub>18</sub>H<sub>38</sub>NO<sub>4</sub>, 332.2801).

**(1S,2S,3S,4S,5R)-1-diethylamino-cyclohexane-2,3,4,5-tetraol (38).** Colorless oil (quantitative yield). <sup>1</sup>H NMR (D<sub>2</sub>O, 400 MHz) δ 4.12 (br s, 1H, H-2), 3.38 (br d, *J* = 7.2 Hz, 2H, H-3,5), 3.25 (br d, *J* = 7.2 Hz, 1H, H-4), 3.09 (br d, *J* = 12.4 Hz, 1H, H-1), 2.99 (br d, *J* = 6.4 Hz, 4H, -HN(CH<sub>2</sub>)<sub>2</sub>-), 1.98 (br d, *J* = 10.0 Hz, 1H, H-6), 1.68 (m, 1H, H-6), 1.03 (t, *J* = 6.4 Hz, 6H, -(CH<sub>3</sub>)<sub>2</sub>); <sup>13</sup>C NMR (D<sub>2</sub>O, 100 MHz) δ 73.9, 72.3, 69.7, 68.2, 57.1, 44.1, 28.6, 8.9; HRMS *m/z* 220.1550 [M+H]<sup>+</sup> (calcd for C<sub>10</sub>H<sub>22</sub>NO<sub>4</sub>, 220.1549).

**(1S,2S,3S,4S,5R)-1-dibutylamino-cyclohexane-2,3,4,5-tetraol (39).** Pale yellow solid (96%). <sup>1</sup>H NMR (D<sub>2</sub>O, 400 MHz) δ 4.13 (br s, 1H, H-2), 3.33-3.38 (m, 2H, H-3,5), 3.23-3.27 (m, 2H, H-1,4), 3.01-3.05 (m, 4H, -HN(CH<sub>2</sub>)<sub>2</sub>-), 2.03 (br d, *J* = 12 Hz, 1H, H-6), 1.69 (m, 1H, H-6), 1.44-1.48 (m, 4H, -(CH<sub>2</sub>)<sub>2</sub>-), 1.15-1.20 (m, 4H, -(CH<sub>2</sub>)<sub>2</sub>CH<sub>3</sub>), 0.73 (t, *J* = 6.8 Hz, 6H, -(CH<sub>3</sub>)<sub>2</sub>); <sup>13</sup>C NMR (D<sub>2</sub>O, 100 MHz) δ 73.4, 71.9, 69.1, 67.4, 58.5, 49.9, 28.2, 24.9, 19.2, 12.6; HRMS *m/z* 276.2169 [M+H]<sup>+</sup> (calcd for C<sub>14</sub>H<sub>30</sub>NO<sub>4</sub>, 276.2175).

**(1S,2S,3S,4S,5R)-1-dihexylamino-cyclohexane-2,3,4,5-tetraol (40).** White powder (49%). <sup>1</sup>H NMR (CD<sub>3</sub>OD, 400 MHz) δ 4.02 (br s, 1H, H-2), 3.43 (dd, *J* = 9.2, 9.2 Hz, 1H, H-4), 3.30 (m, 1H, H-5), 3.16 (dd, *J* = 9.6, 2.0 Hz, 1H, H-3), 2.74 (br s, 5H, H-1, -HN(CH<sub>2</sub>)<sub>2</sub>-), 1.76-1.84 (m, 2H, H-6), 1.43 (br s, 4H, -(CH<sub>2</sub>)<sub>2</sub>-), 1.23 (br s, 12H, -(CH<sub>2</sub>)<sub>6</sub>-), 0.82 (t, *J* = 6.4 Hz, 6H, -(CH<sub>3</sub>)<sub>2</sub>); <sup>13</sup>C NMR (CD<sub>3</sub>OD, 100 MHz) δ 76.2, 74.9, 72.2, 71.2, 59.3, 52.1, 32.8, 31.0, 28.0, 27.4, 23.7, 14.4; HRMS *m/z* 332.2796 [M+H]<sup>+</sup> (calcd for C<sub>18</sub>H<sub>38</sub>NO<sub>4</sub>, 332.2801).

**(1R,2S,3S,4S,5R)-1-diethylamino-cyclohexane-2,3,4,5-tetraol (41).** Colorless oil (quantitative yield).  $[\alpha]_D^{20} = +42.5$  (c 0.25, H<sub>2</sub>O); <sup>1</sup>H NMR (D<sub>2</sub>O, 400 MHz)  $\delta$  3.94 (br s, 1H, H-2), 3.58 (br s, 2H, H-3,5), 3.51 (m, 1H, H-4), 2.87 (br d,  $J = 3.6$  Hz, 1H, H-1), 2.50-2.65 (m, 4H, -HN(CH<sub>2</sub>)<sub>2</sub>-), 1.79 (m, 1H, H-6), 1.67 (m, 1H, H-6), 0.86 (t,  $J = 7.2$  Hz, 6H, -(CH<sub>3</sub>)<sub>2</sub>); <sup>13</sup>C NMR (D<sub>2</sub>O, 100 MHz)  $\delta$  73.5, 72.1, 69.5, 68.8, 57.3, 43.4, 27.6, 9.6; HRMS  $m/z$  220.1552 [M+H]<sup>+</sup> (calcd for C<sub>10</sub>H<sub>22</sub>NO<sub>4</sub>, 220.1549).

**(1R,2S,3S,4S,5R)-1-dibutylamino-cyclohexane-2,3,4,5-tetraol (42).** Pale yellow oil (50%). <sup>1</sup>H NMR (CD<sub>3</sub>OD, 400 MHz)  $\delta$  3.86 (br s, 1H, H-2), 3.70-3.77 (m, 3H, H-3,4,5), 3.03 (br s, 1H, H-1), 2.54-2.57 (m, 2H, -HN(CH<sub>2</sub>)<sub>2</sub>-), 2.39-2.42 (m, 2H, -HN(CH<sub>2</sub>)<sub>2</sub>-), 1.72-1.75 (m, 2H, H-6), 1.36-1.40 (m, 4H, -(CH<sub>2</sub>)<sub>2</sub>-), 1.19-1.28 (m, 4H, -(CH<sub>2</sub>)<sub>2</sub>CH<sub>3</sub>), 0.85 (t,  $J = 6.8$  Hz, 6H, -(CH<sub>3</sub>)<sub>2</sub>); <sup>13</sup>C NMR (CD<sub>3</sub>OD, 100 MHz)  $\delta$  74.5, 73.2, 72.3, 69.7, 57.3, 51.1, 31.2, 27.9, 21.6, 14.4; HRMS  $m/z$  276.2169 [M+H]<sup>+</sup> (calcd for C<sub>14</sub>H<sub>30</sub>NO<sub>4</sub>, 276.2175).

**(1R,2S,3S,4S,5R)-1-dihexylamino-cyclohexane-2,3,4,5-tetraol (43).** Pale yellow oil (46%). <sup>1</sup>H NMR (D<sub>2</sub>O, 400 MHz)  $\delta$  3.91-3.97 (m, 3H, H-2,3,5), 3.84 (br s, 1H, H-4), 3.70 (m, 1H, H-1), 3.08-3.16 (m, 2H, -HN(CH<sub>2</sub>)<sub>2</sub>-), 2.89 (br s, 2H, -HN(CH<sub>2</sub>)<sub>2</sub>-), 1.80-1.94 (m, 2H, H-6), 1.51-1.62 (m, 4H, -(CH<sub>2</sub>)<sub>2</sub>-), 1.13 (br s, 12H, -(CH<sub>2</sub>)<sub>6</sub>-), 0.68 (t,  $J = 6.4$  Hz, 6H, -(CH<sub>3</sub>)<sub>2</sub>); <sup>13</sup>C NMR (D<sub>2</sub>O, 100 MHz)  $\delta$  73.3, 70.5, 69.2, 65.6, 56.9, 51.2, 30.4, 25.6, 25.1, 24.4, 21.7, 13.2; HRMS  $m/z$  332.2799 [M+H]<sup>+</sup> (calcd for C<sub>18</sub>H<sub>38</sub>NO<sub>4</sub>, 332.2801).

### **$\alpha$ -Glucosidase inhibitory activities**

#### **Baker's yeast $\alpha$ -glucosidase inhibitory activity**

The  $\alpha$ -glucosidase inhibition assay was performed according to the slightly modified method of Wacharasindhu *et al.*<sup>1</sup> The  $\alpha$ -glucosidase (0.1 U/mL) and substrate (1 mM *p*-nitrophenyl- $\alpha$ -D-glucopyranoside) were dissolved in 0.1 M phosphate buffer, pH 6.9. 10  $\mu$ L of synthesized compounds (1 mg/mL in DMSO) was pre-incubated with 40  $\mu$ L of  $\alpha$ -glucosidase at 37 °C for 10 min. A 50  $\mu$ L substrate solution was then added to the reaction mixture and incubated at 37 °C for 20 min, and terminated by adding 100  $\mu$ L of 1 M Na<sub>2</sub>CO<sub>3</sub>. Enzymatic activity was quantified by measuring the absorbance at 405 nm (Bio-Rad microplate reader model 3550 UV). The percentage inhibition was calculated by  $[(A_0 - A_1)/A_0] \times 100$ , where  $A_0$  is the absorbance without the sample, and  $A_1$  is the absorbance with the sample. The IC<sub>50</sub> value was determined from a plot of percentage inhibition versus sample concentration. Acarbose<sup>®</sup> was used as standard control and the experiment was performed in duplicate.

#### **Rat intestinal $\alpha$ -glucosidase inhibitory activity**

Rat intestinal  $\alpha$ -glucosidase inhibitory activity was determined according to our previous report.<sup>2</sup> The crude enzyme solution prepared from rat intestinal acetone powder was used as a source of maltase and sucrose. Rat intestinal acetone powder (1 g) was homogenized in 30 mL of 0.9% NaCl solution. After centrifugation (12,000g  $\times$  30 min), the aliquot was subjected to assay. A 10  $\mu$ L of synthesized compounds (1 mg/mL in DMSO) was added with 30  $\mu$ L of the 0.1 M phosphate buffer (pH 6.9), 20  $\mu$ L of the substrate solution (maltose: 10 mM; sucrose: 100 mM) in 0.1 M phosphate buffer, 80  $\mu$ L of glucose assay kit, and 20  $\mu$ L of the crude enzyme solution. The reaction mixture was then incubated at 37 °C for 10 min (for maltose) and 40 min (for sucrose). Enzymatic activity was quantified by measuring the absorbance at 500 nm (Bio-Red microplate reader model 3550 UV). The percentage inhibition was calculated by  $[(A_0 - A_1)/A_0] \times 100$ , where  $A_0$  is the absorbance without the sample, and  $A_1$  is the absorbance with the sample. The IC<sub>50</sub> value was determined from a plot of percentage inhibition versus sample concentration. Acarbose<sup>®</sup> was used as standard control and the experiment was performed in duplicate.

#### **Measurement of kinetic constant<sup>2</sup>**

For kinetic analyses of maltase by the active compounds, enzyme and active compounds were incubated with increasing concentration of maltose (2-20 mM). The type of inhibition was determined by Lineweaver-Burk plot. For calculation of  $K_i$  value, slope from a Lineweaver-Burk plot were replotted vs. [I] which gave the secondary plot.

### **References**

- 1) S. Wacharasindhu, W. Worawalai, W. Rungprom, P. Phuwapraisirisan, *Tetrahedron Lett.*, 2009, **50**, 2189-2192.
- 2) A. Wikul, T. Damsud, K. Kataoka, P. Phuwapraisirisan, *Bioorg. Med. Chem. Lett.* (accepted)

## **NMR spectra of synthesized compounds**



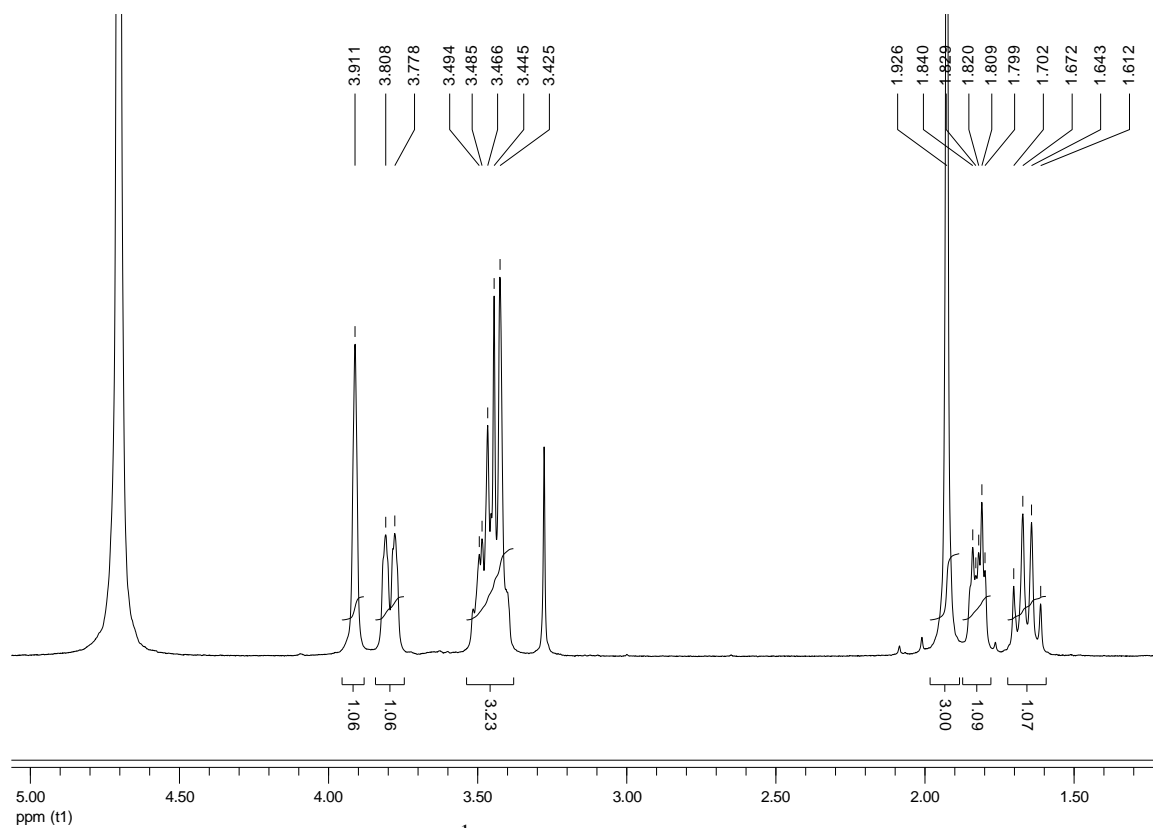

**Figure 1.**  $^1\text{H}$  NMR spectrum of **4** ( $\text{D}_2\text{O}$ )

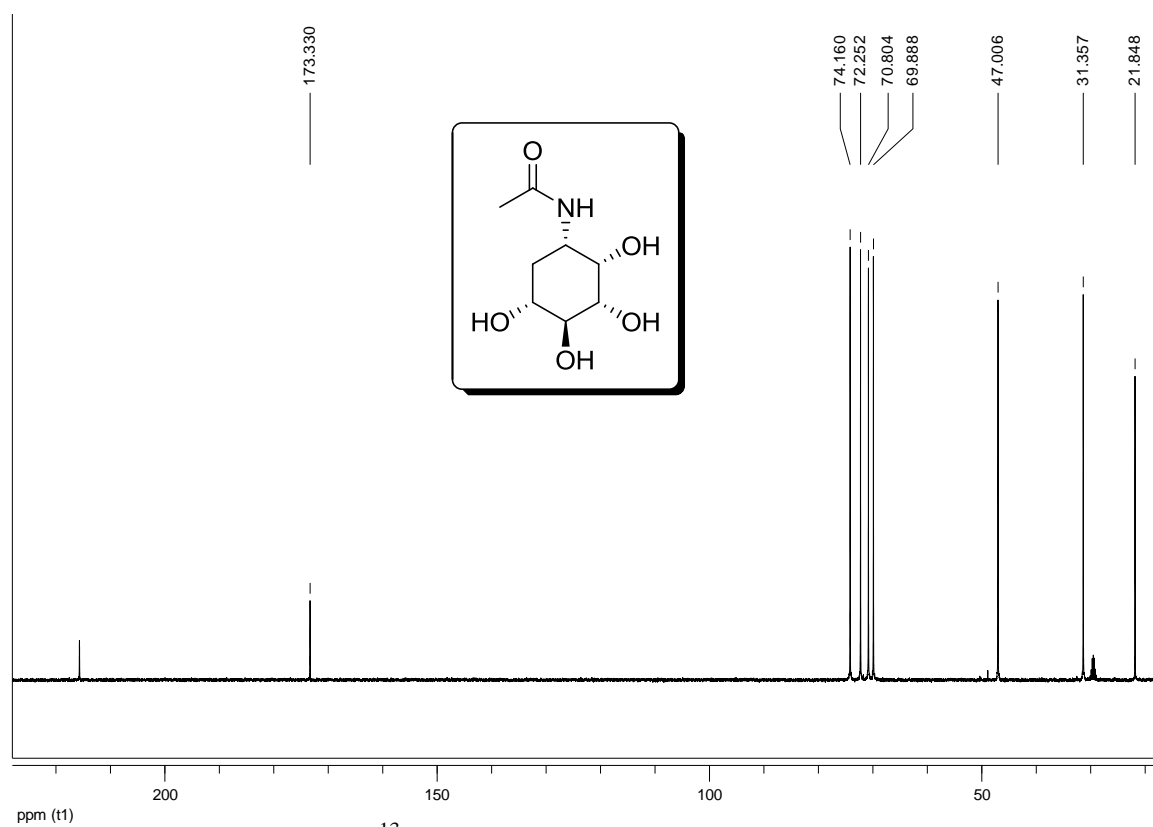

**Figure 2.**  $^{13}\text{C}$  NMR spectrum of **4** ( $\text{D}_2\text{O}+\text{acetone-}d_6$ )

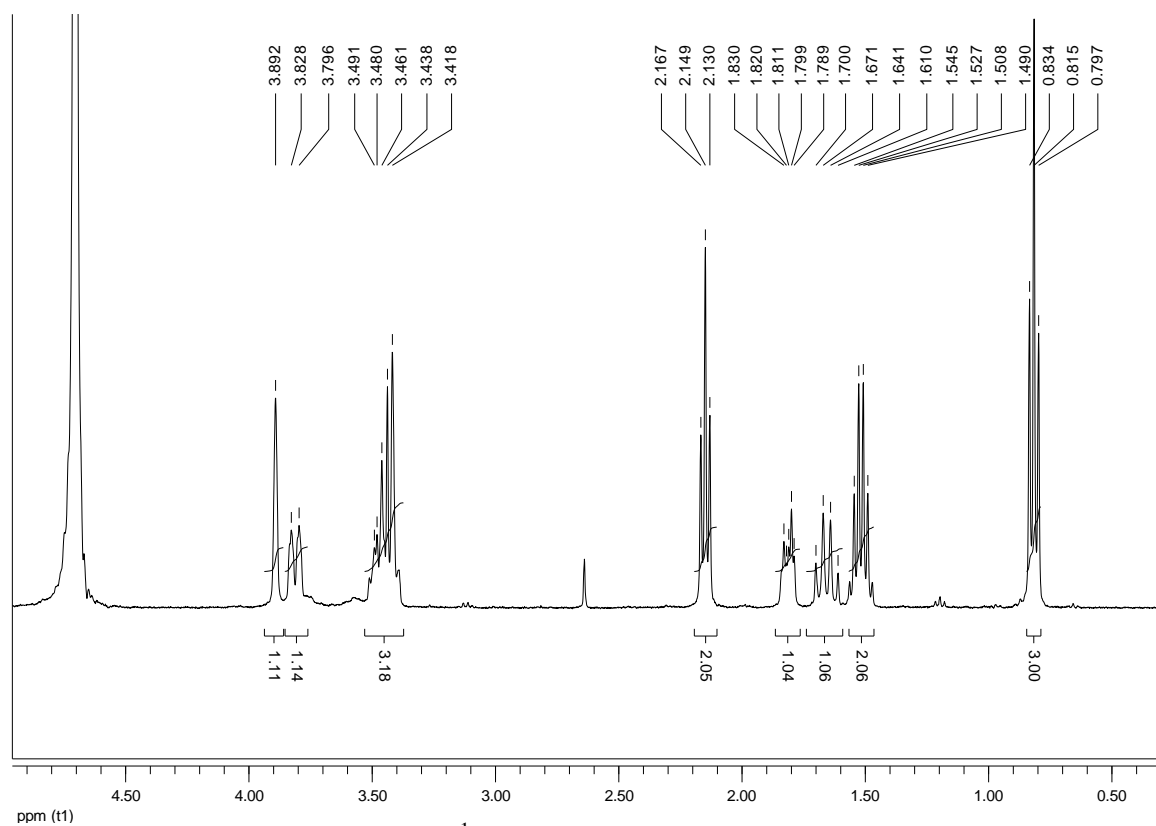

Figure 3.  $^1\text{H}$  NMR spectrum of **5** ( $\text{D}_2\text{O}$ )

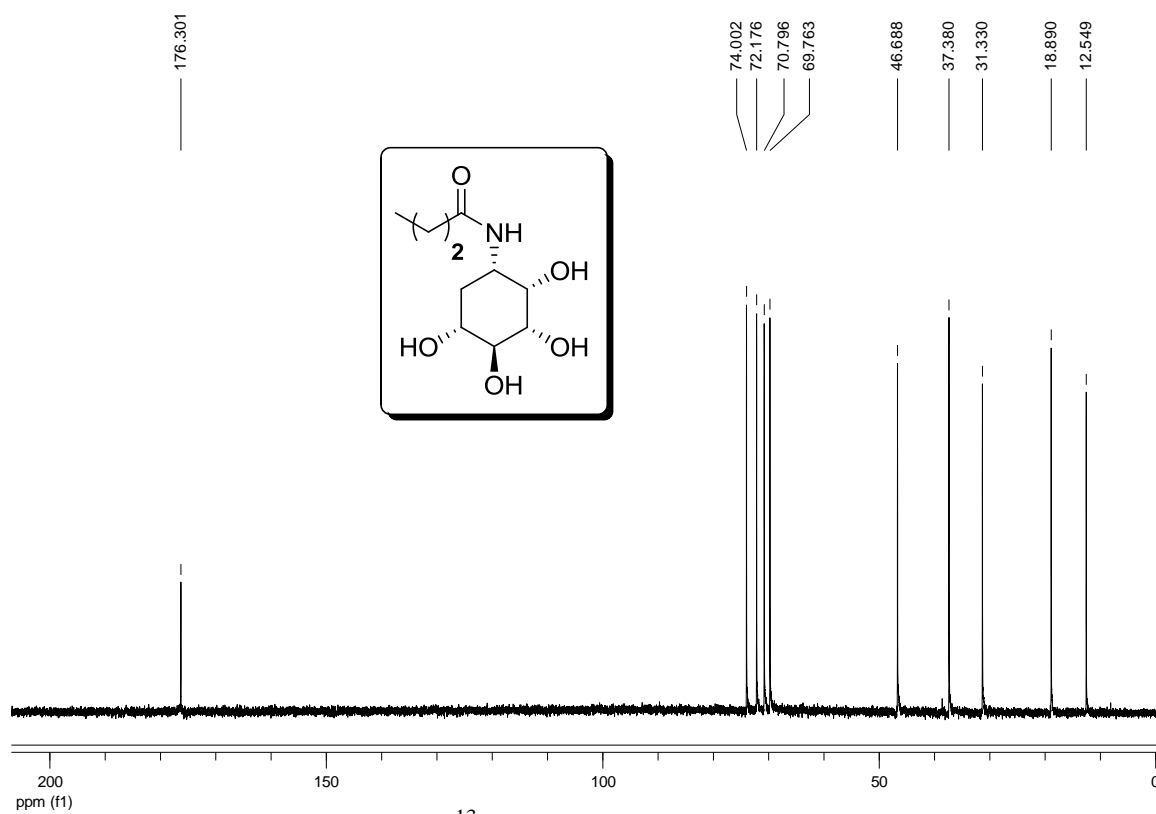

Figure 4.  $^{13}\text{C}$  NMR spectrum of **5** ( $\text{D}_2\text{O}$ )

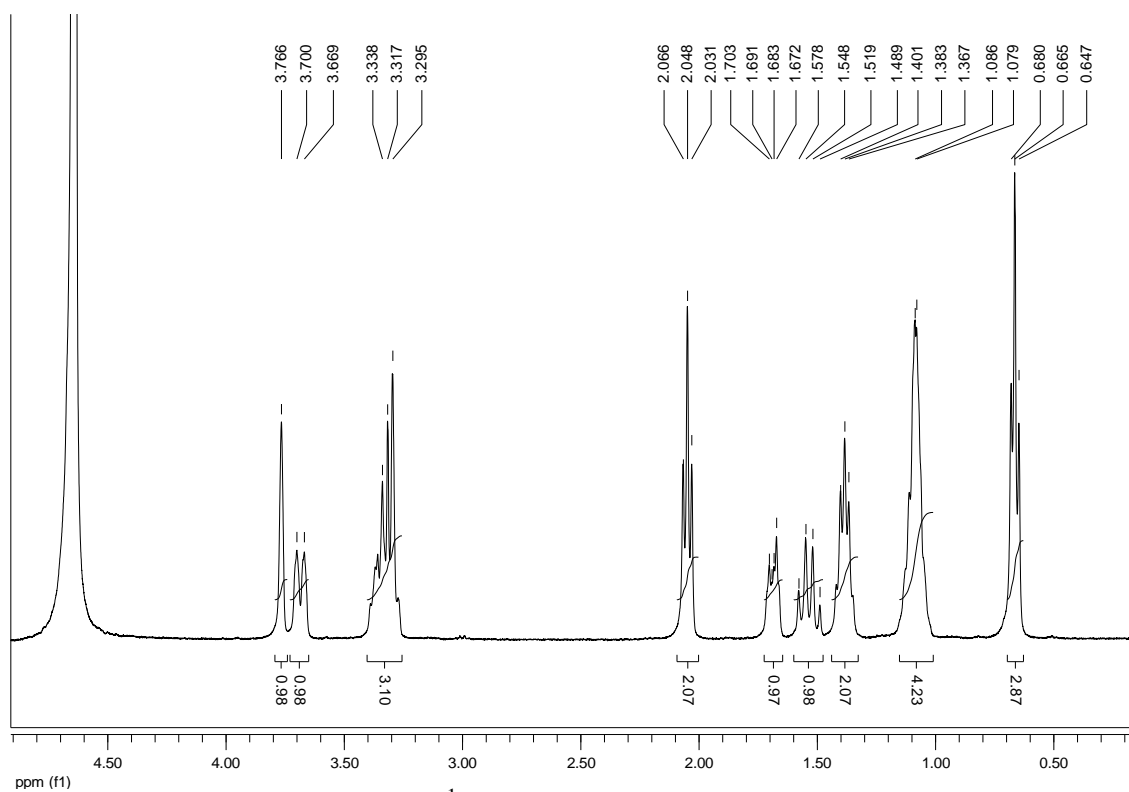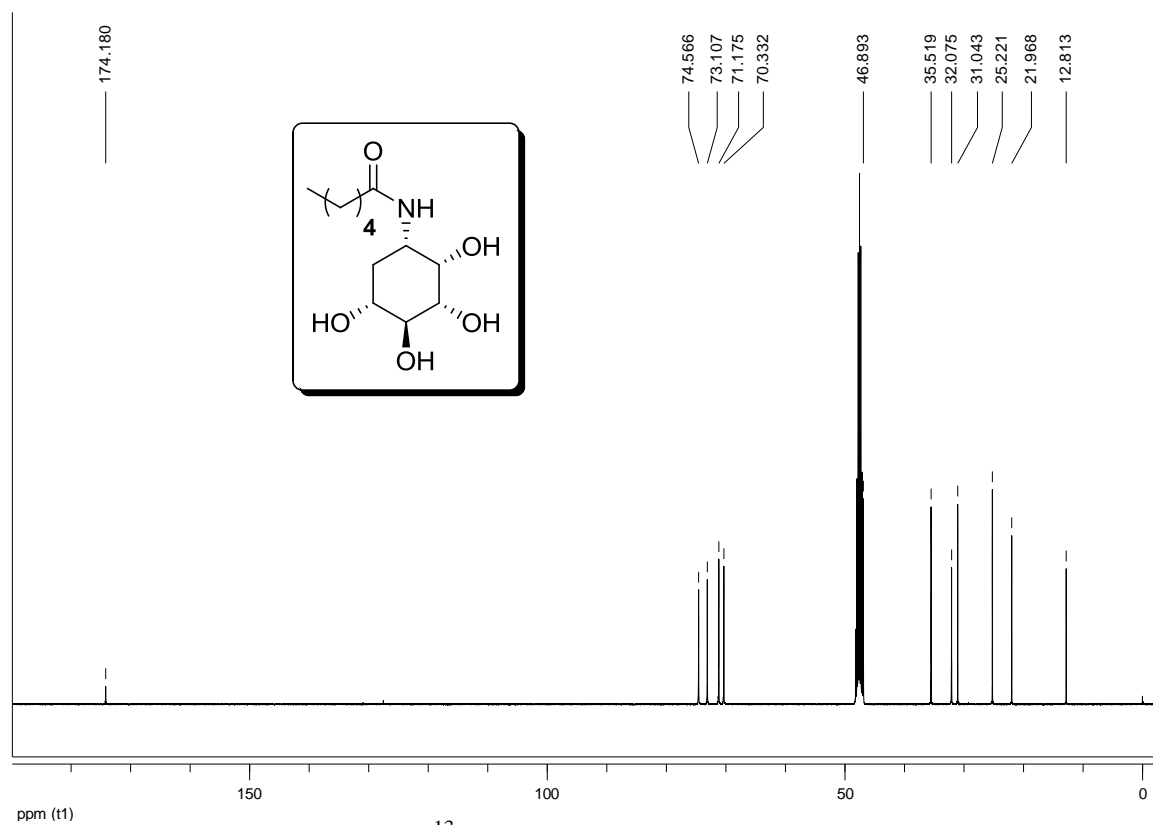

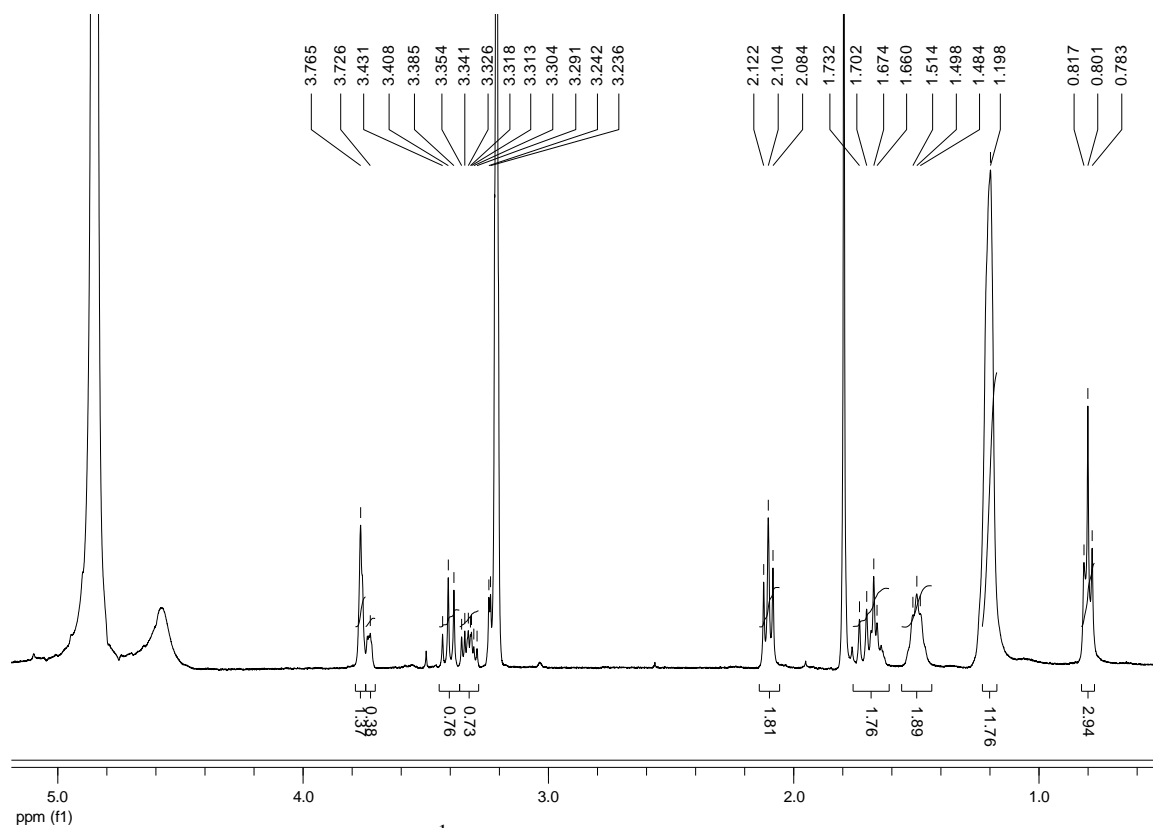

Figure 7.  $^1\text{H}$  NMR spectrum of 7 ( $\text{CD}_3\text{OD}$ )

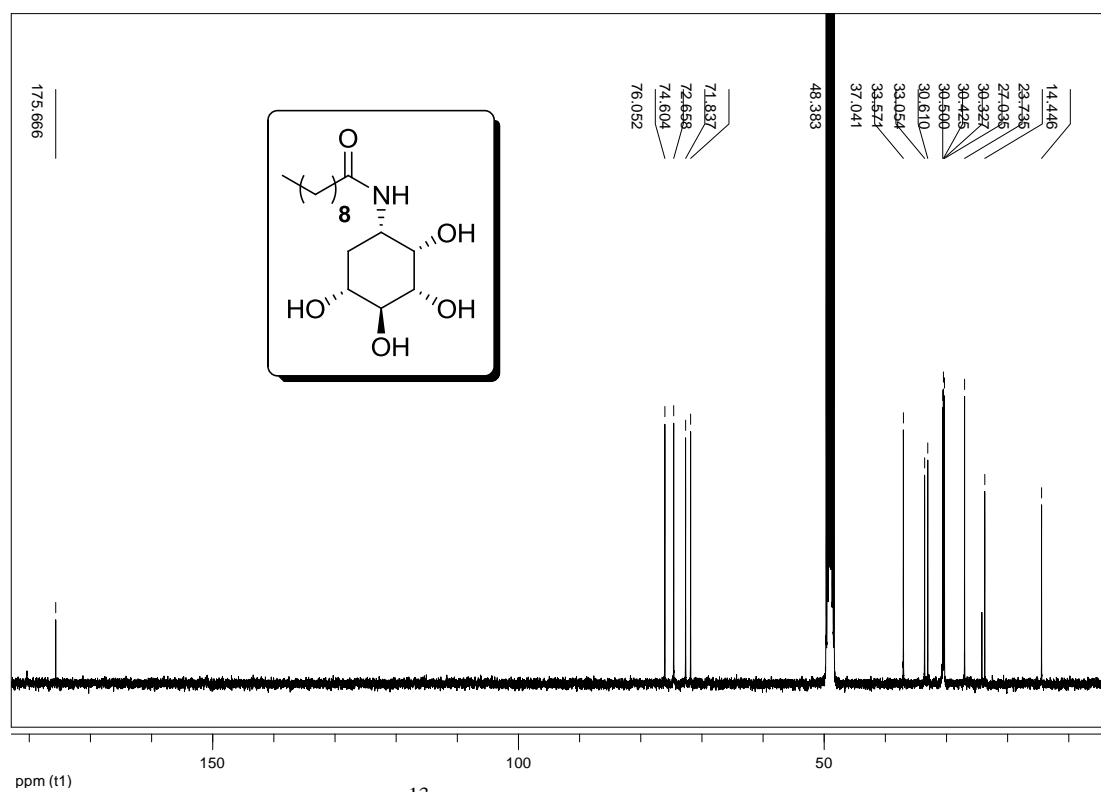

Figure 8.  $^{13}\text{C}$  NMR spectrum of 7 ( $\text{CD}_3\text{OD}$ )

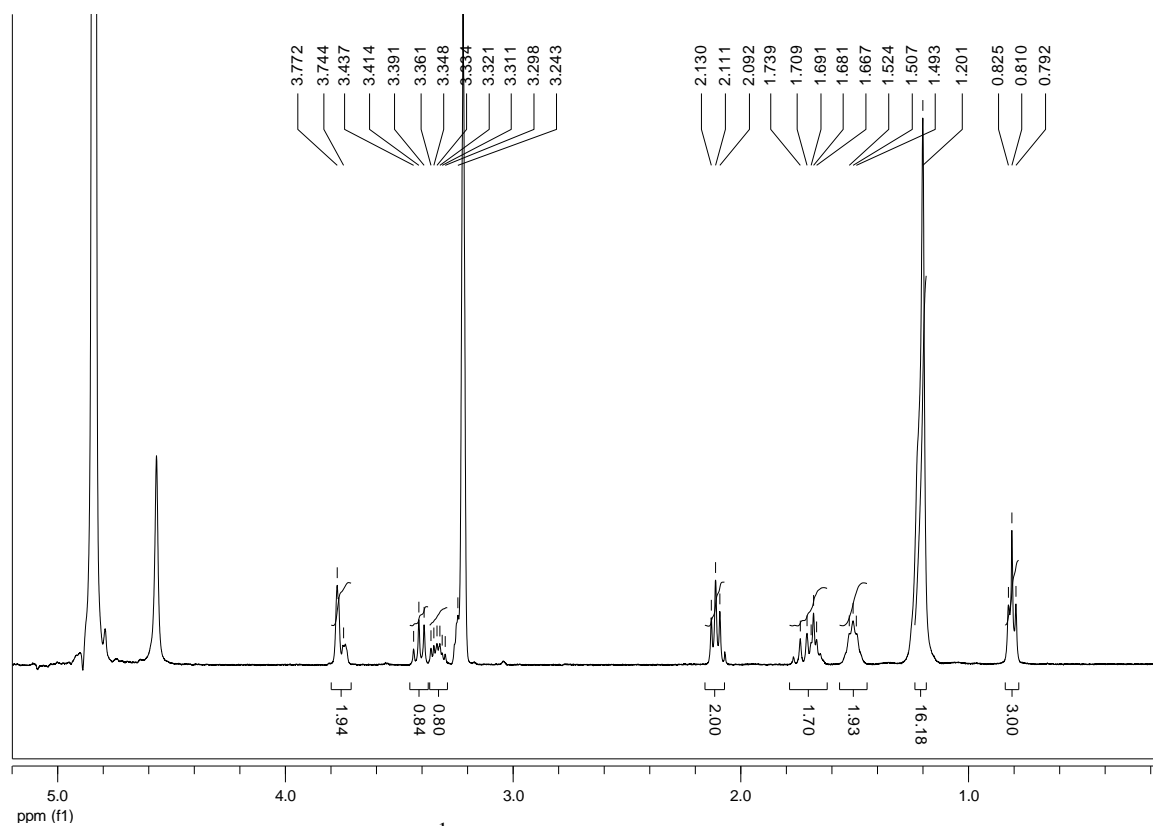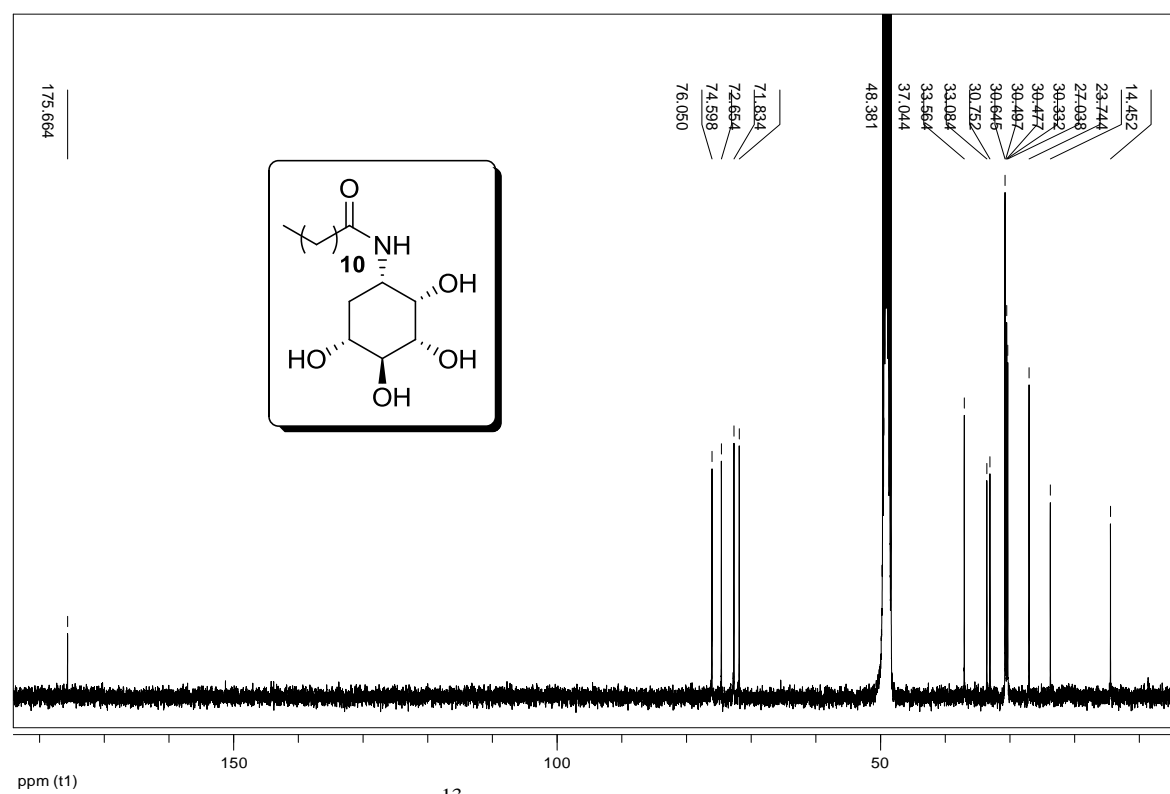

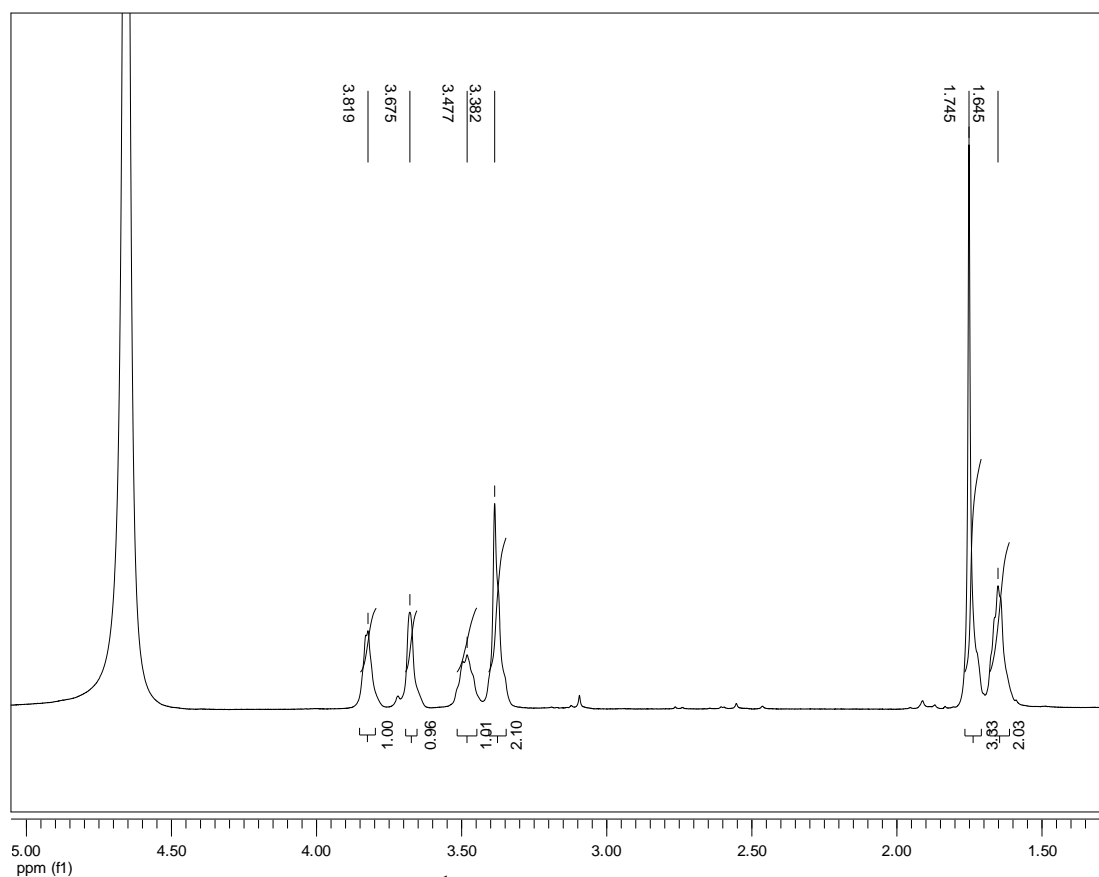

Figure 11.  $^1\text{H}$  NMR spectrum of **9** ( $\text{D}_2\text{O}$ )

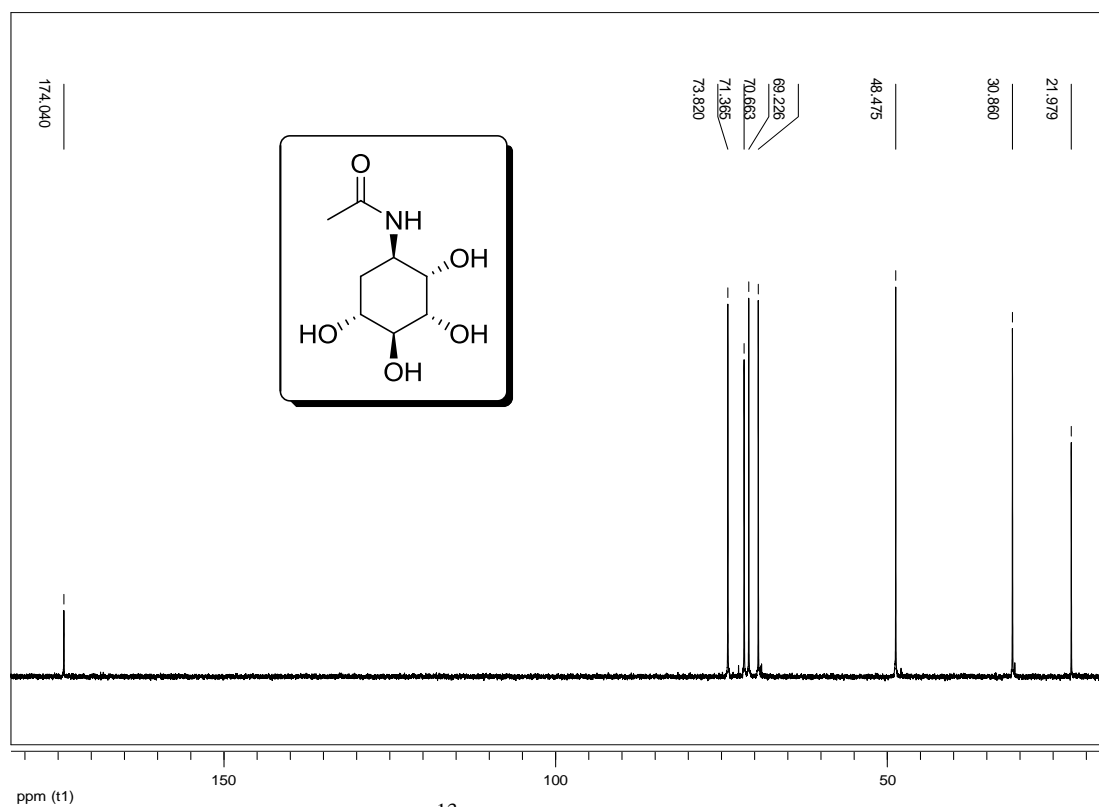

Figure 12.  $^{13}\text{C}$  NMR spectrum of **9** ( $\text{D}_2\text{O}$ )

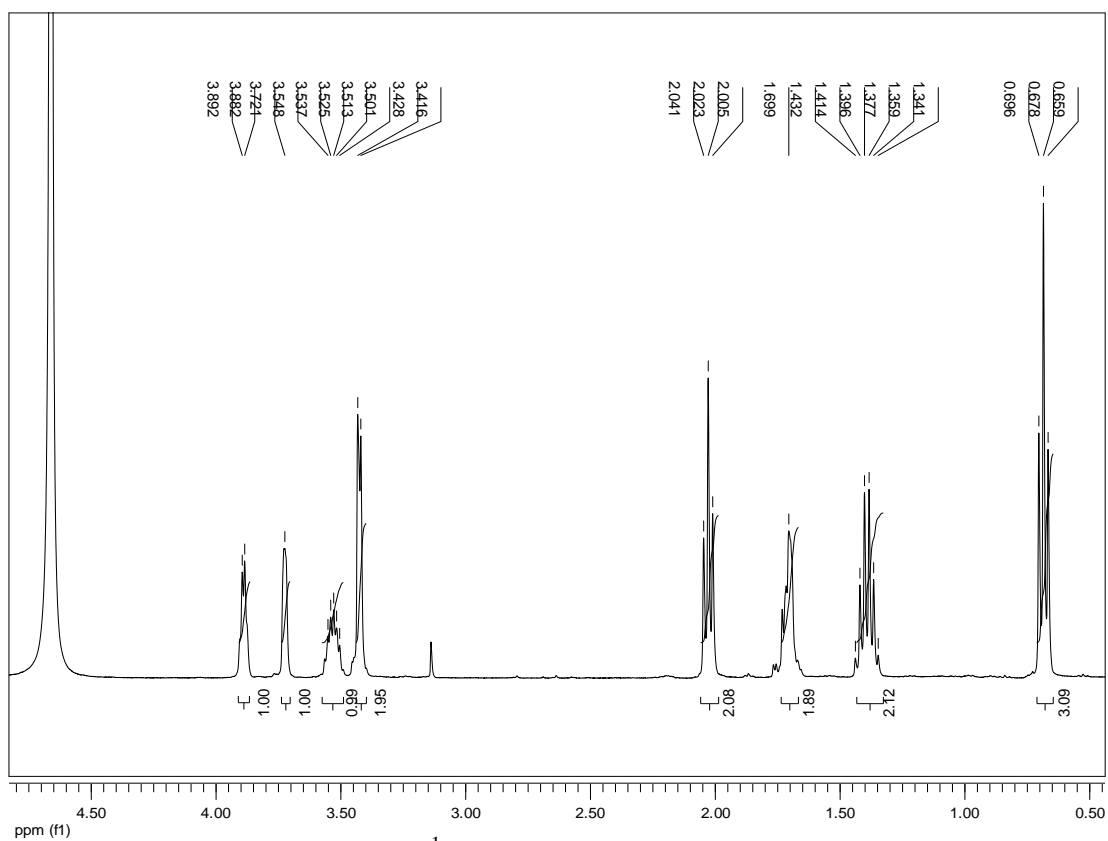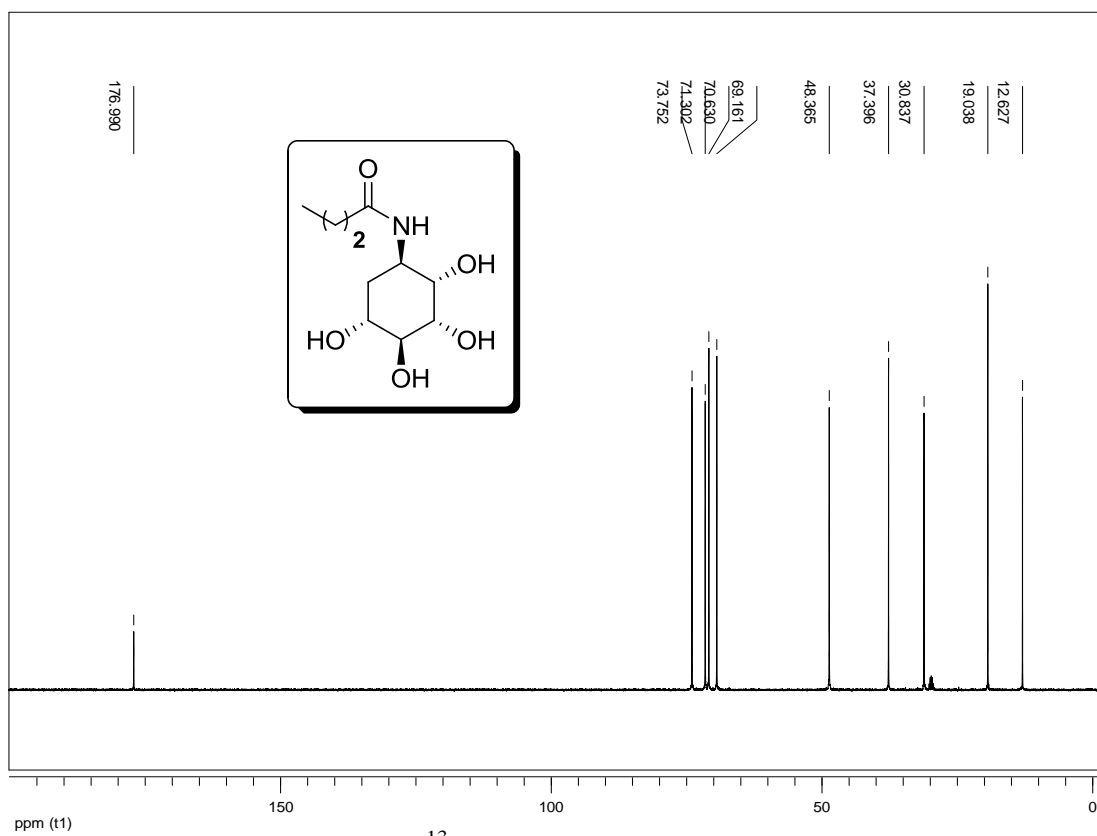

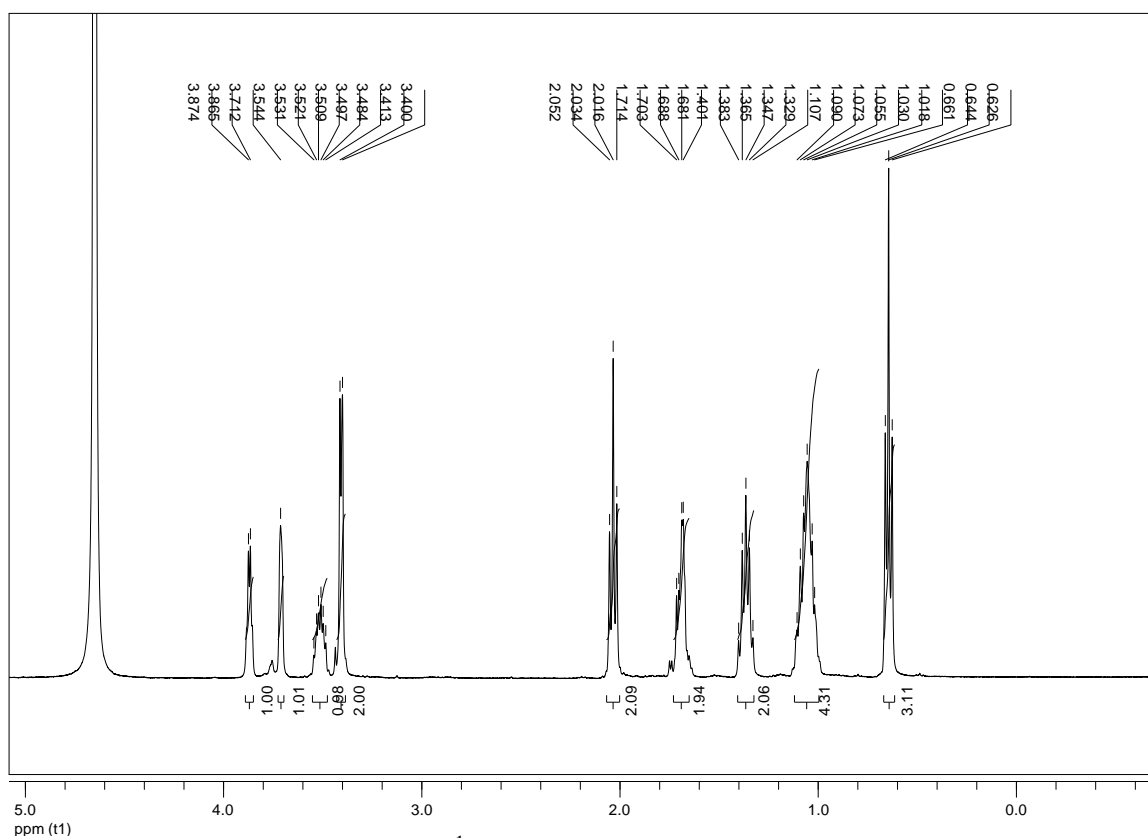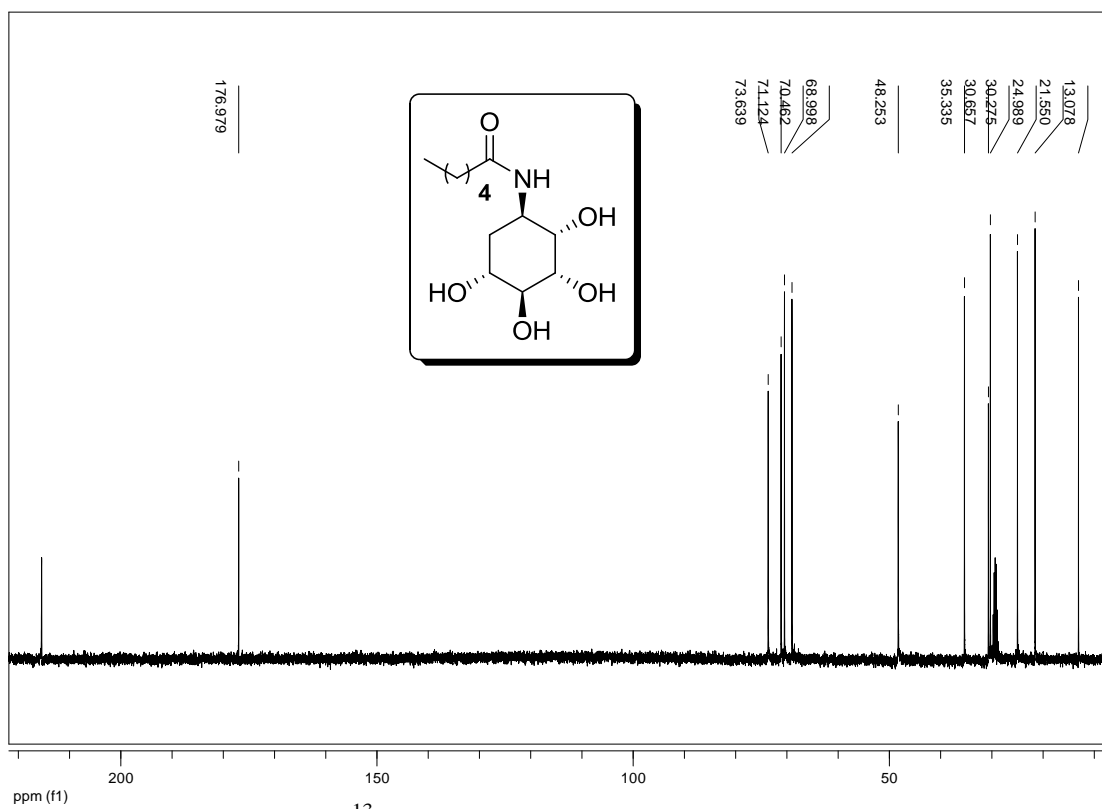



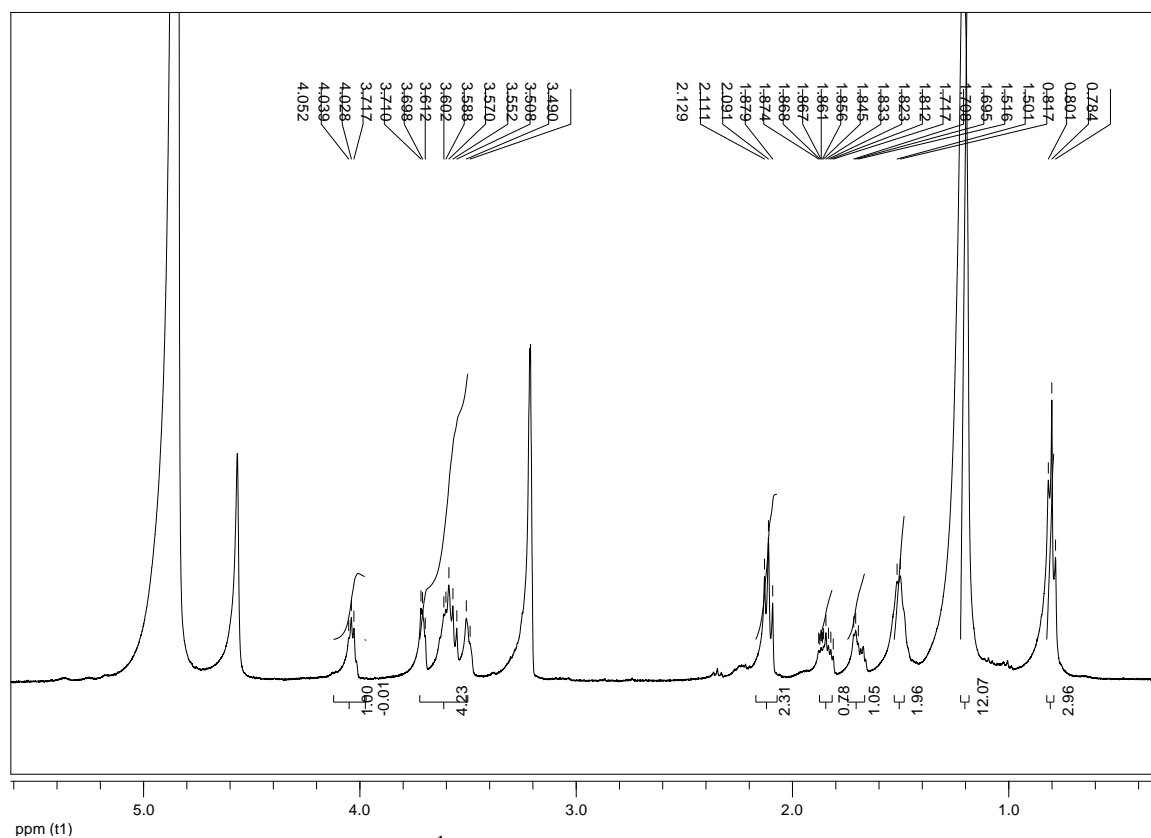

**Figure 17.**  $^1\text{H}$  NMR spectrum of **12** ( $\text{CD}_3\text{OD}$ )

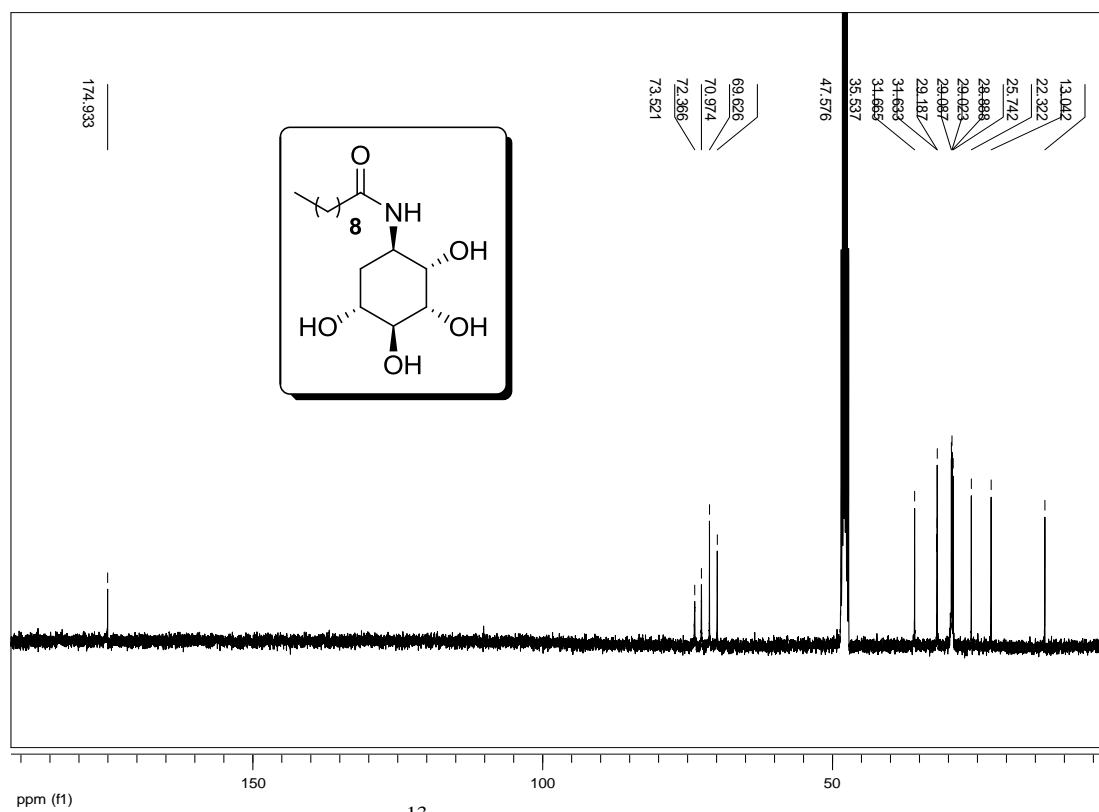

**Figure 18.**  $^{13}\text{C}$  NMR spectrum of **12** ( $\text{CD}_3\text{OD}$ )

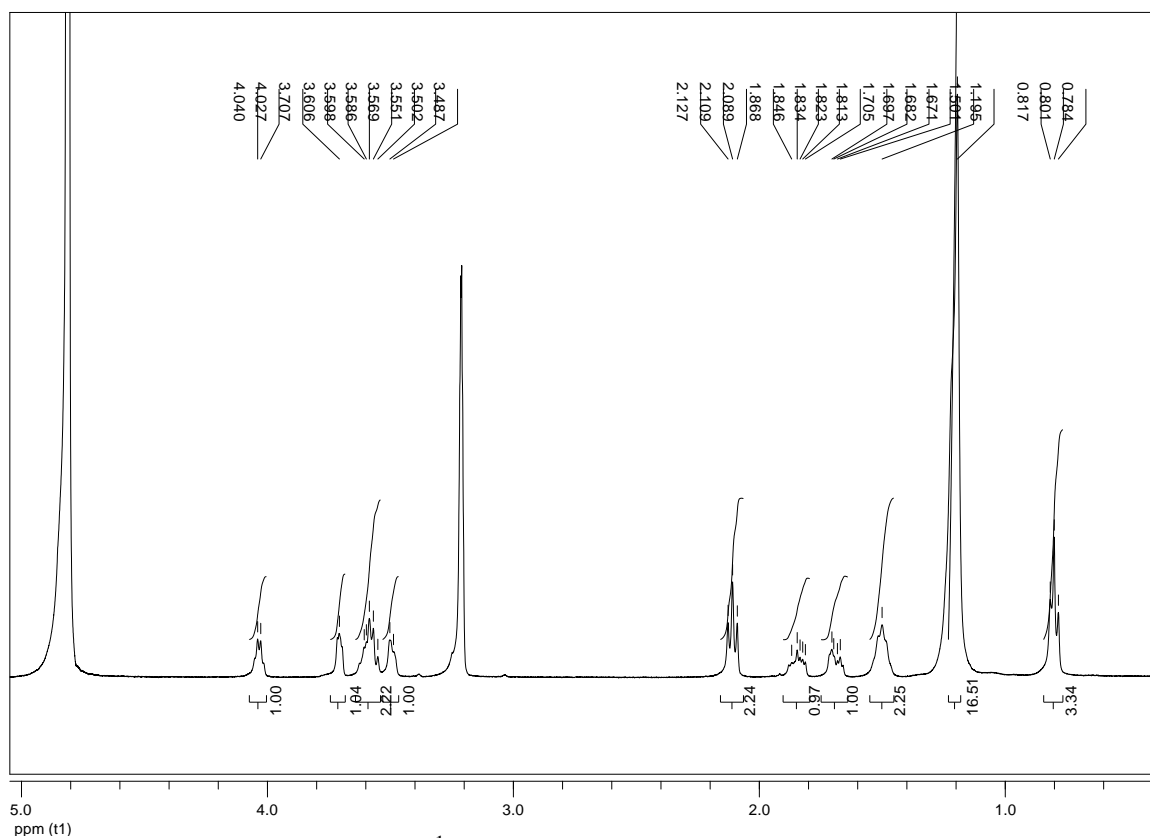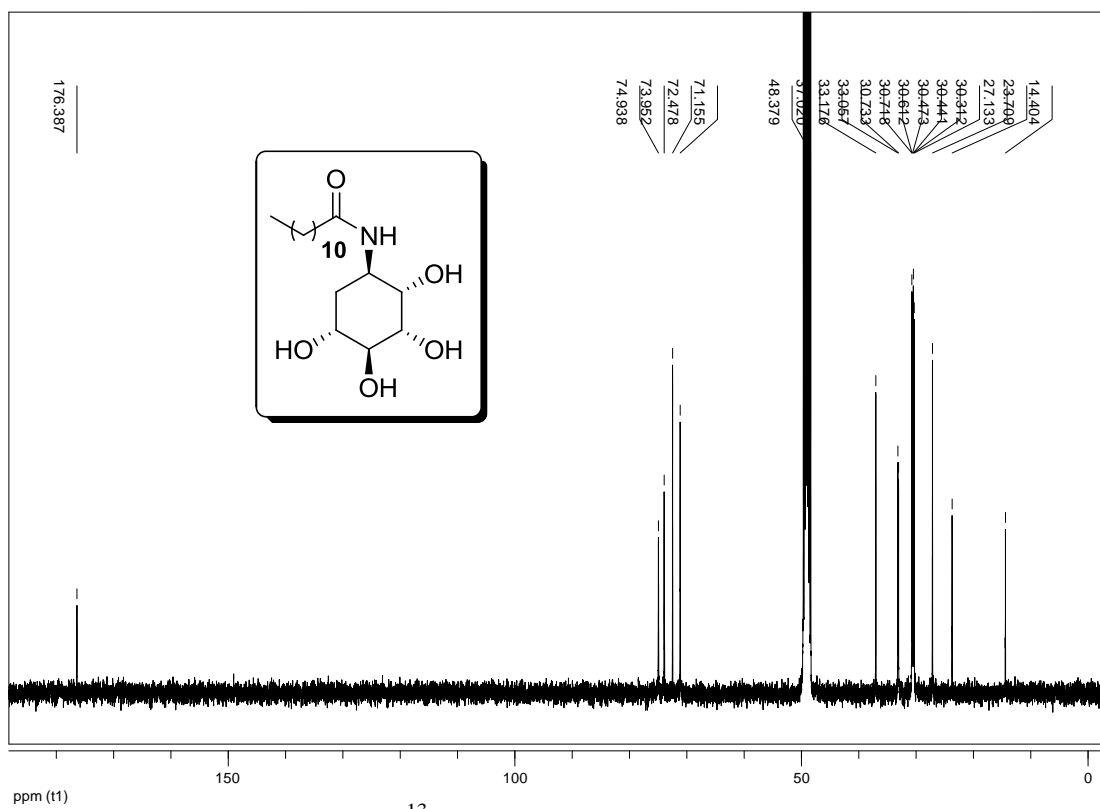

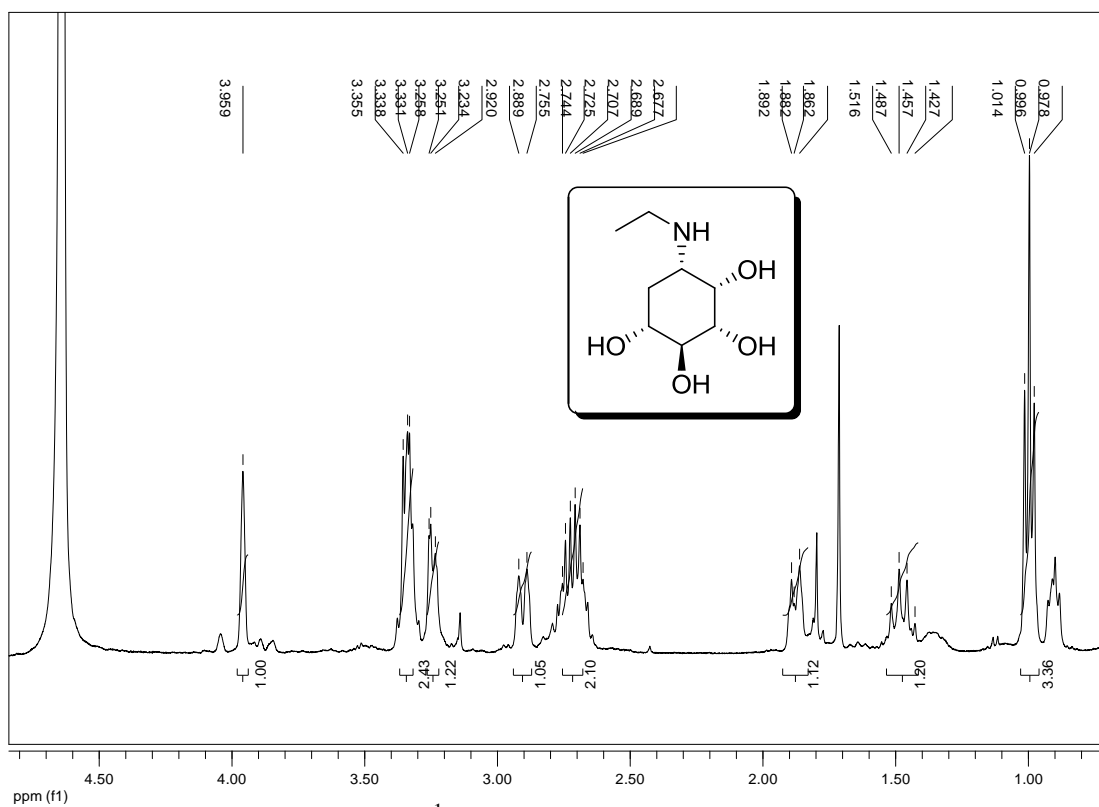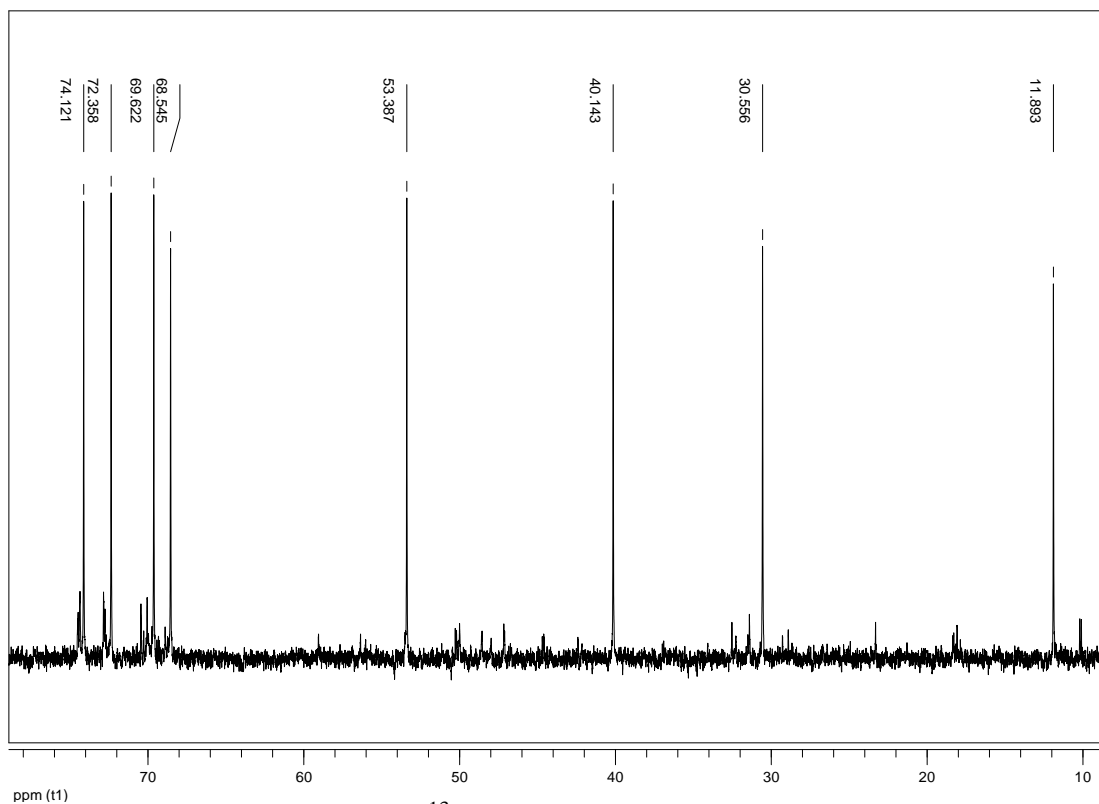

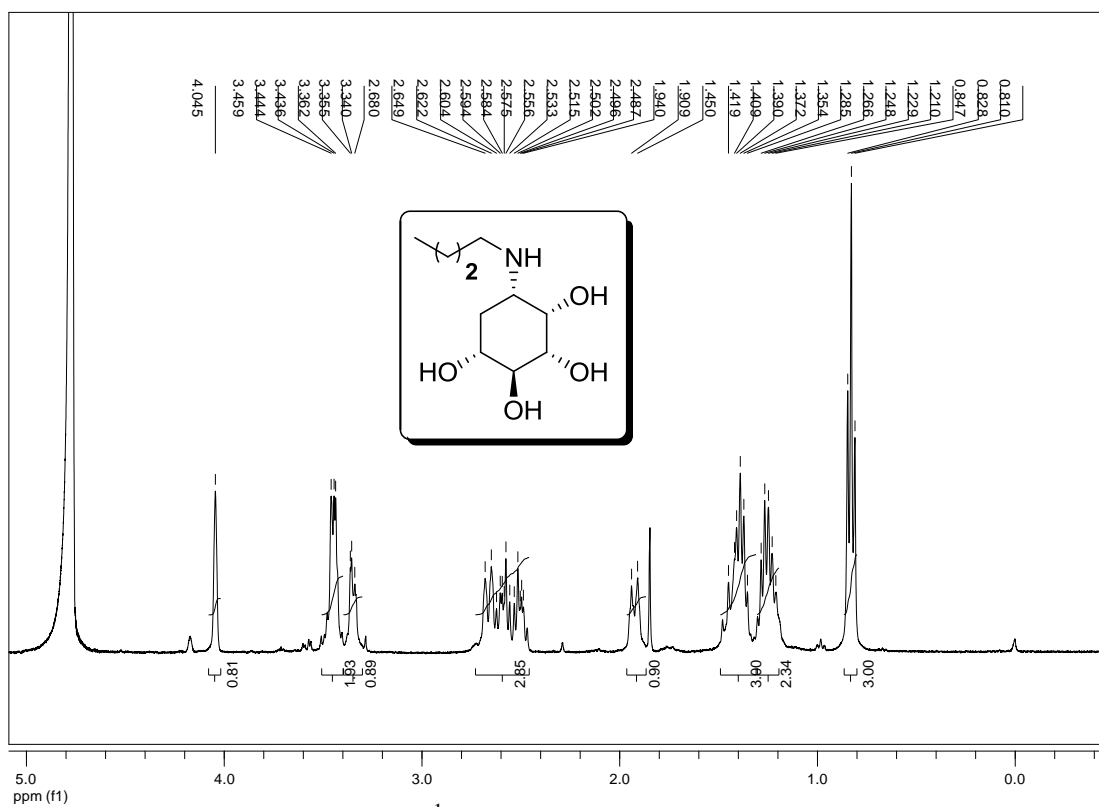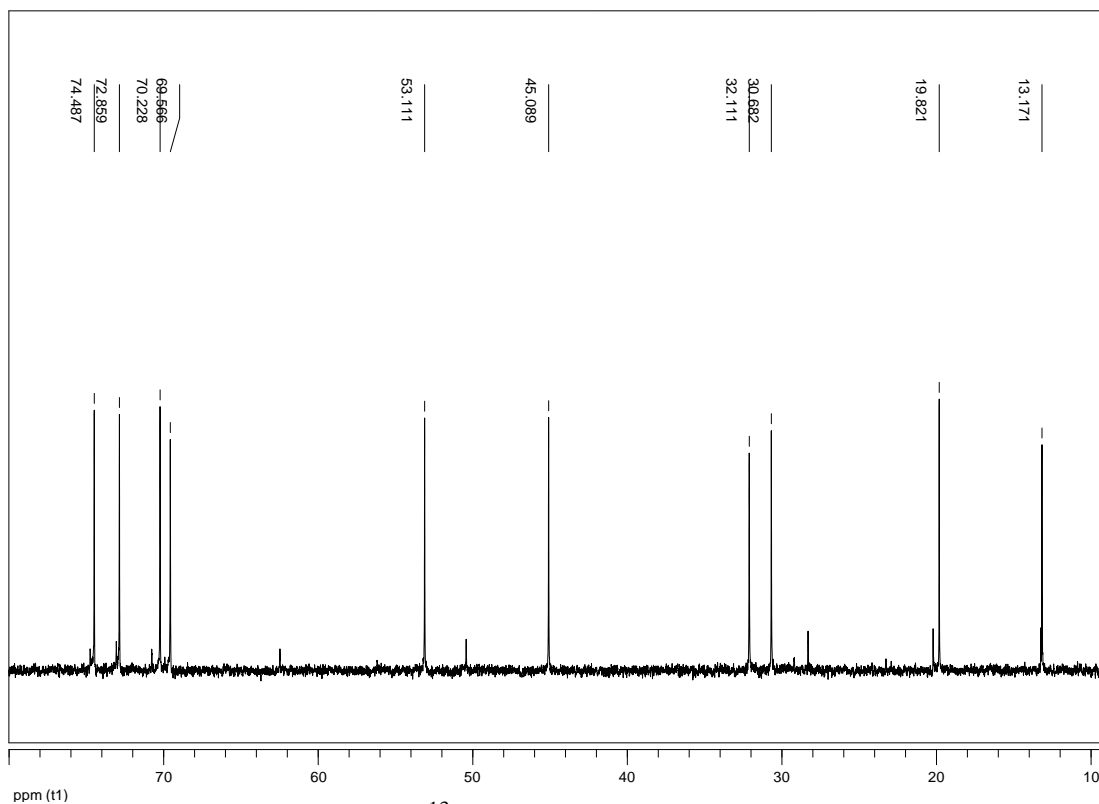

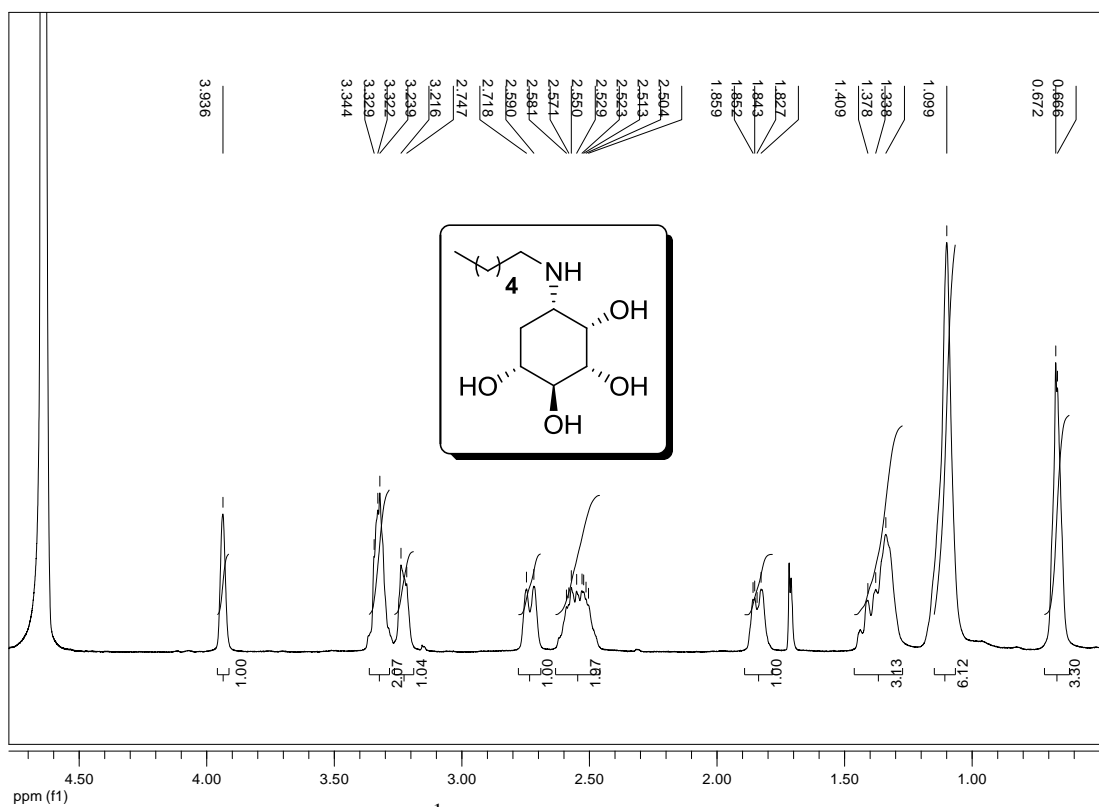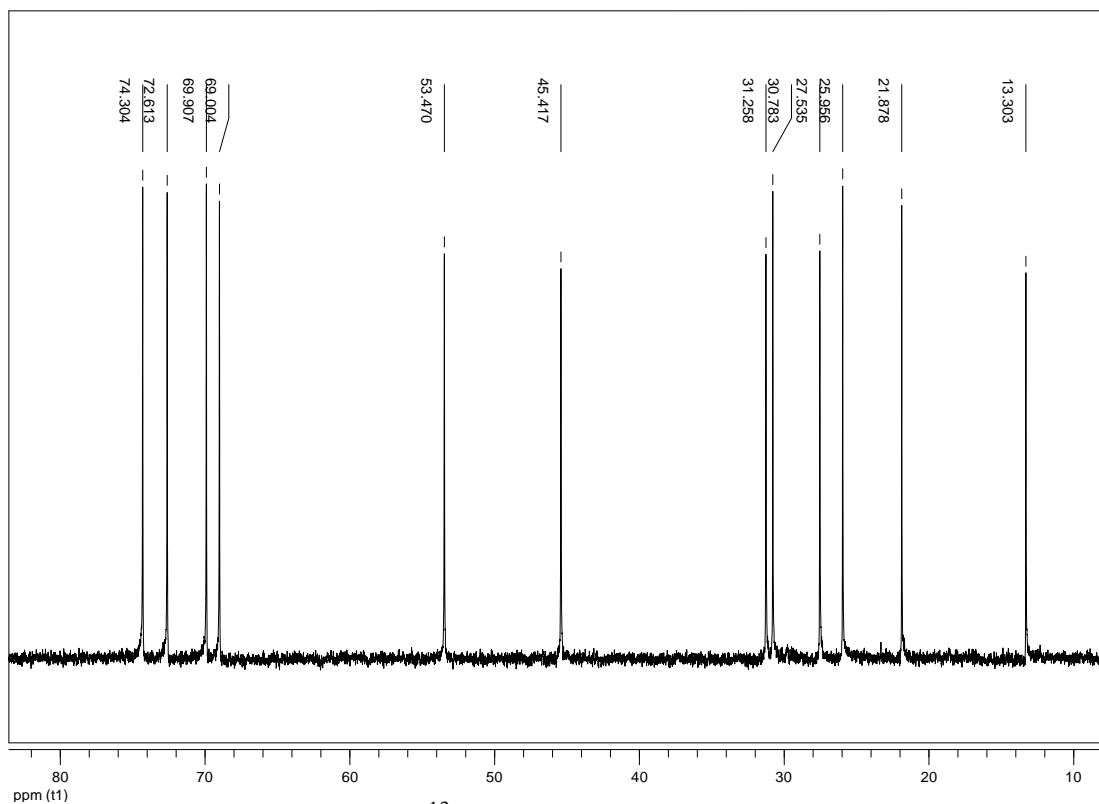

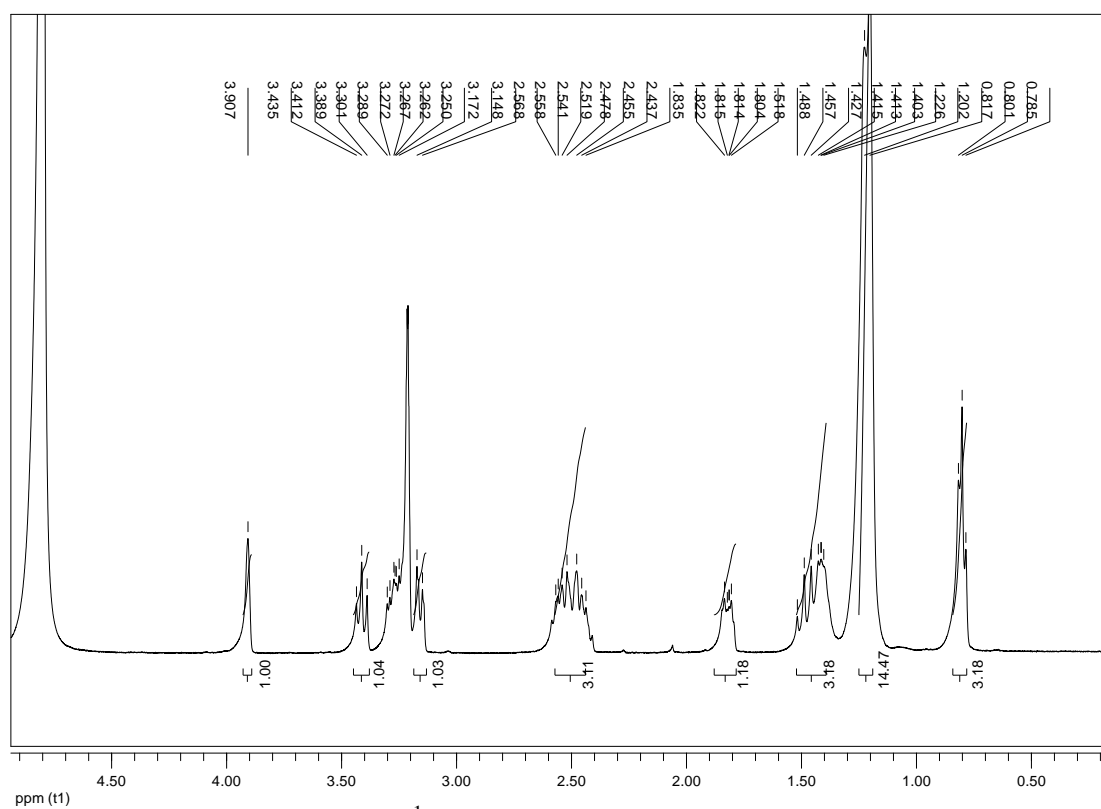

Figure 27.  $^1\text{H}$  NMR spectrum of **32** ( $\text{CD}_3\text{OD}$ )

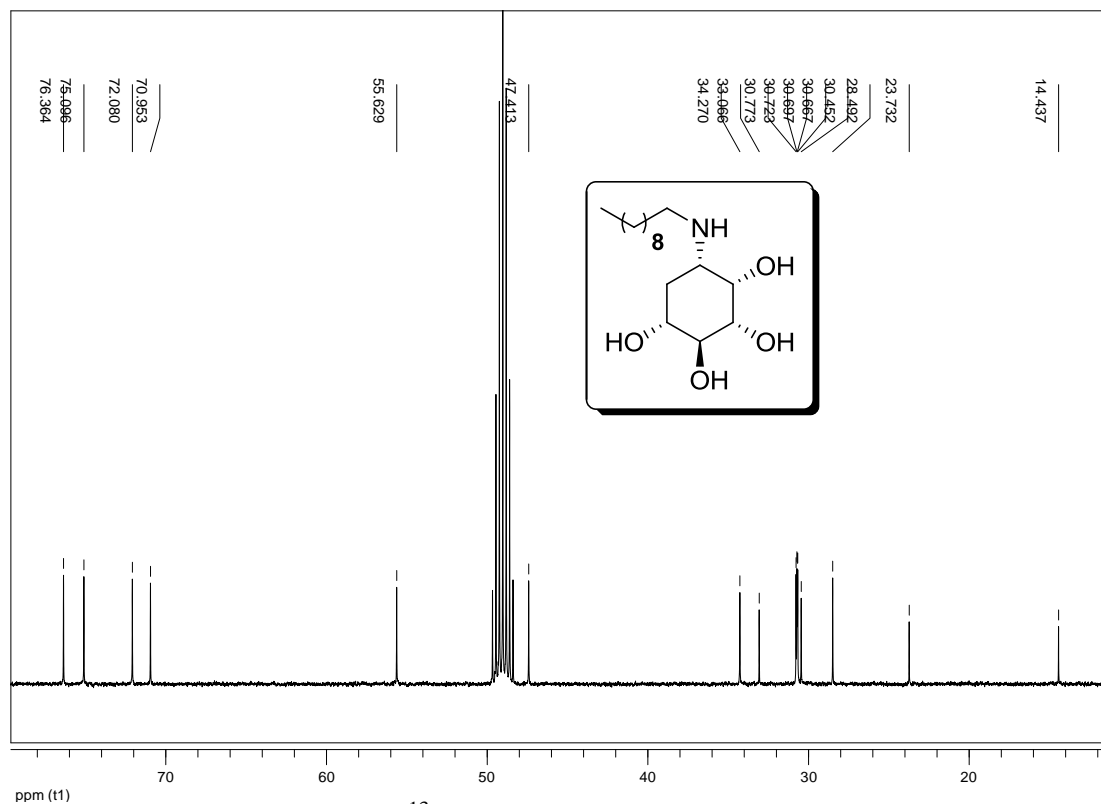

Figure 28.  $^{13}\text{C}$  NMR spectrum of **32** ( $\text{CD}_3\text{OD}$ )

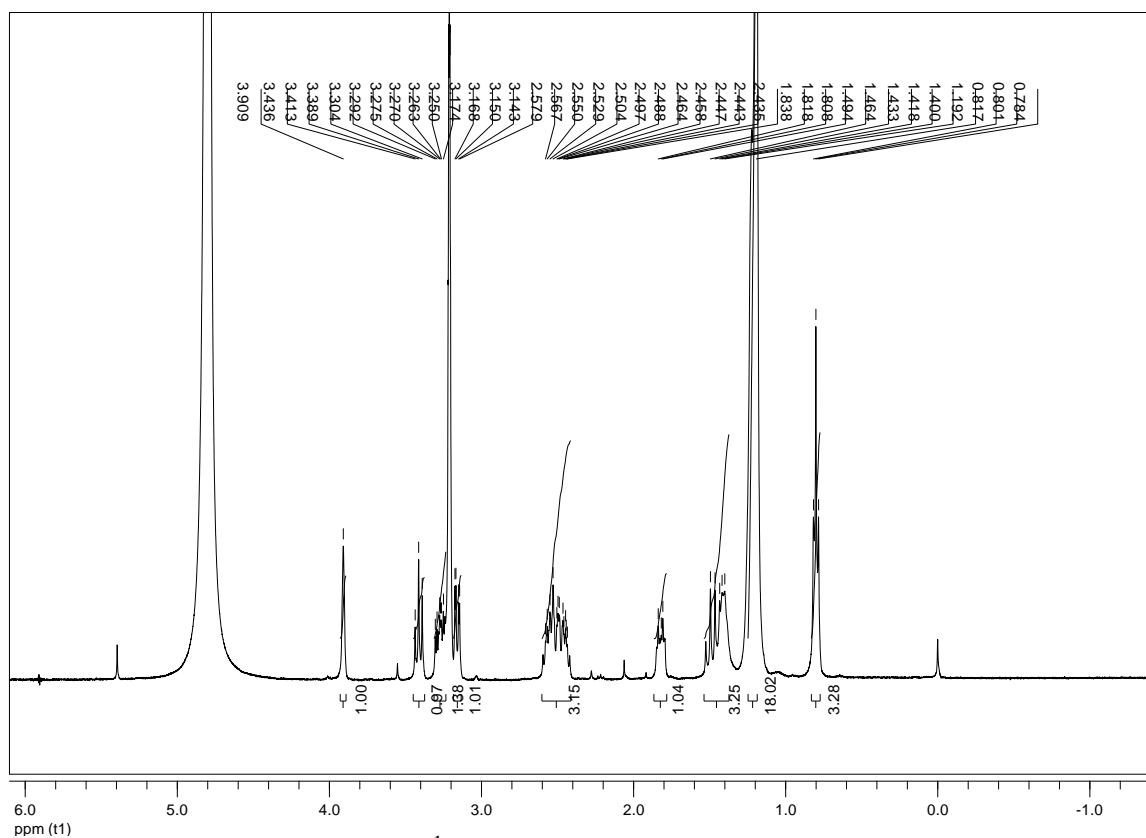

**Figure 29.**  $^1\text{H}$  NMR spectrum of **33** ( $\text{CD}_3\text{OD}$ )

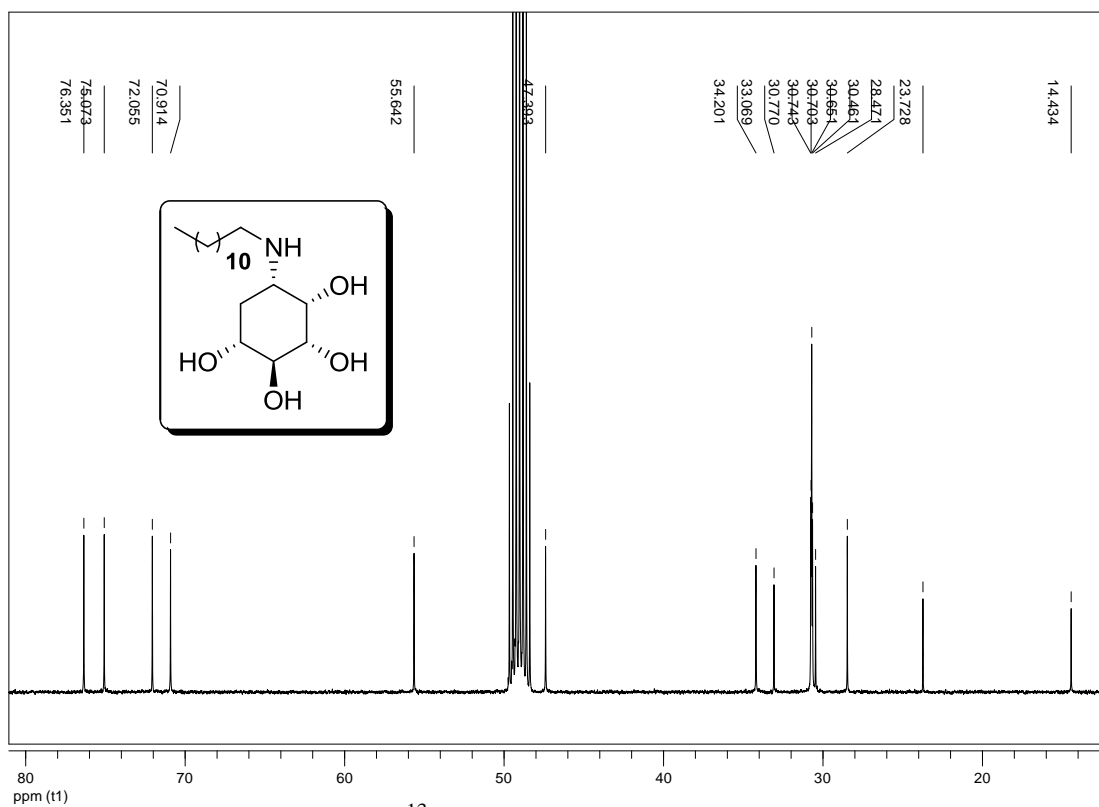

**Figure 30.**  $^{13}\text{C}$  NMR spectrum of **33** ( $\text{CD}_3\text{OD}$ )

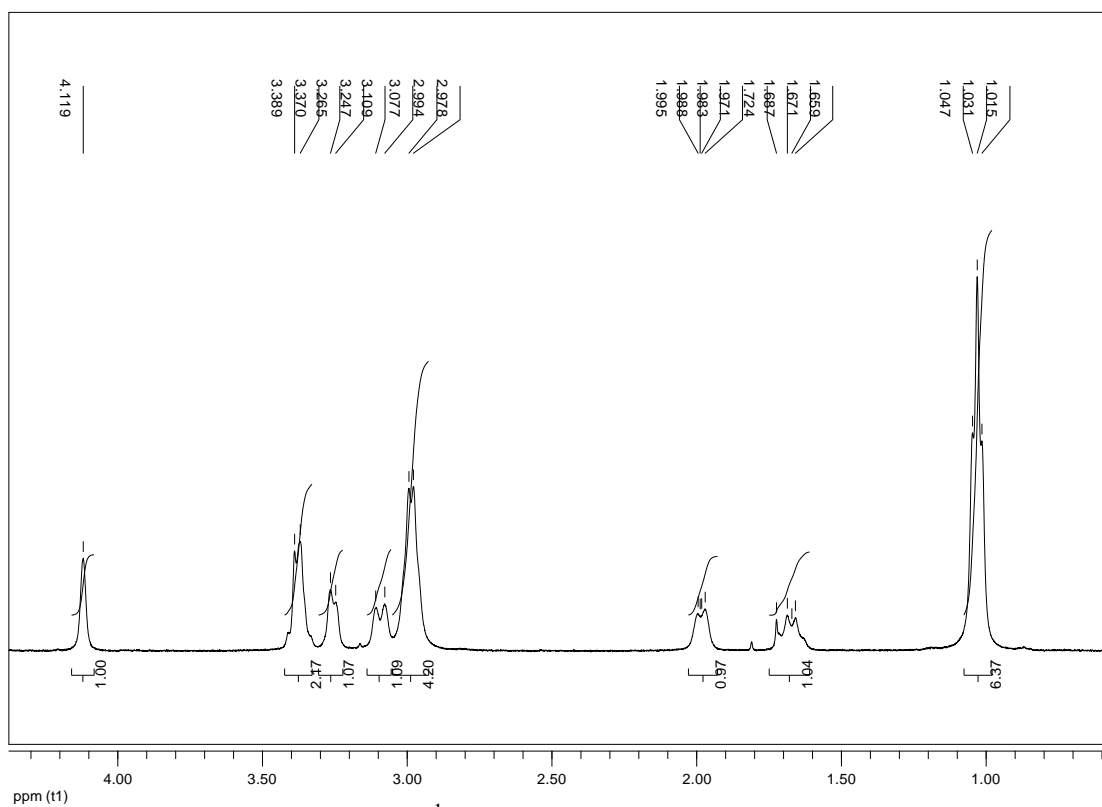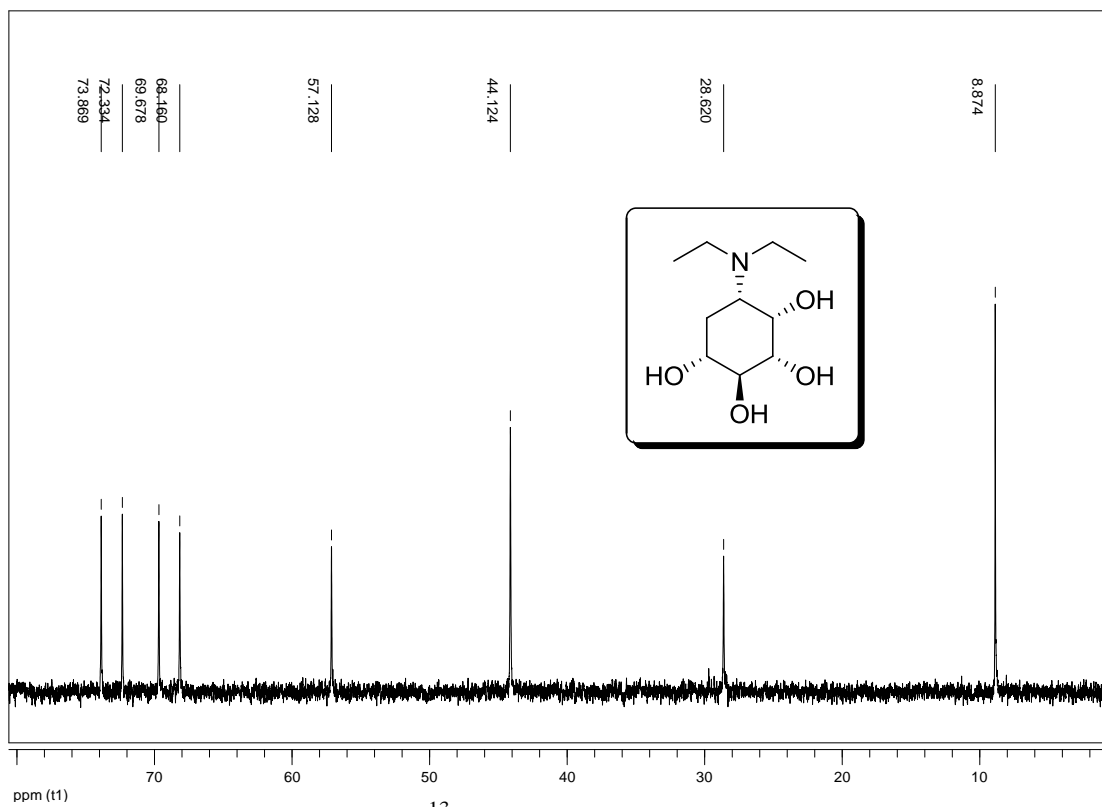



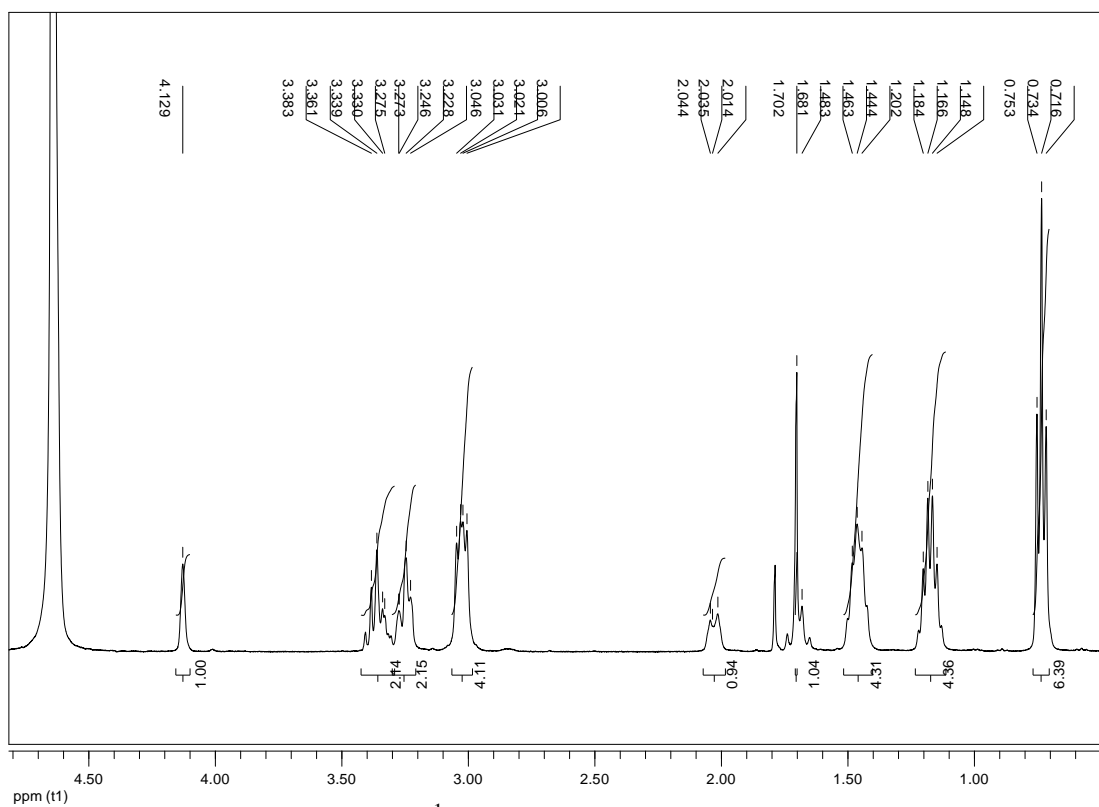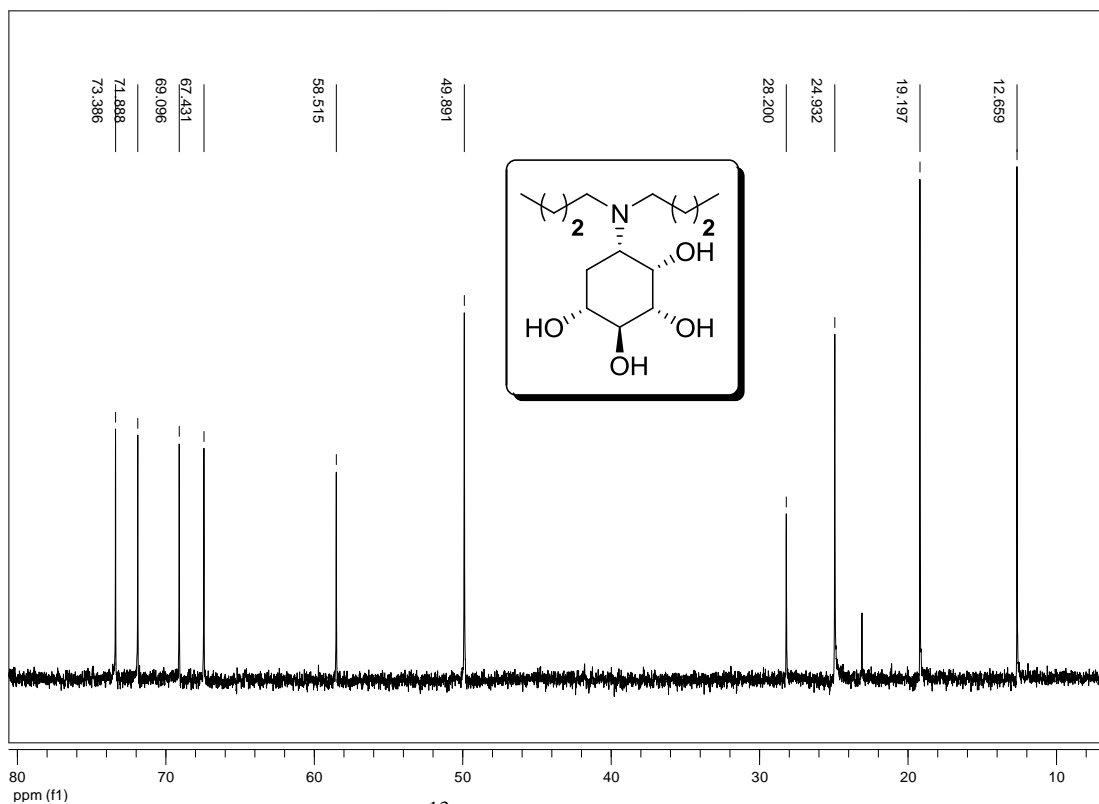

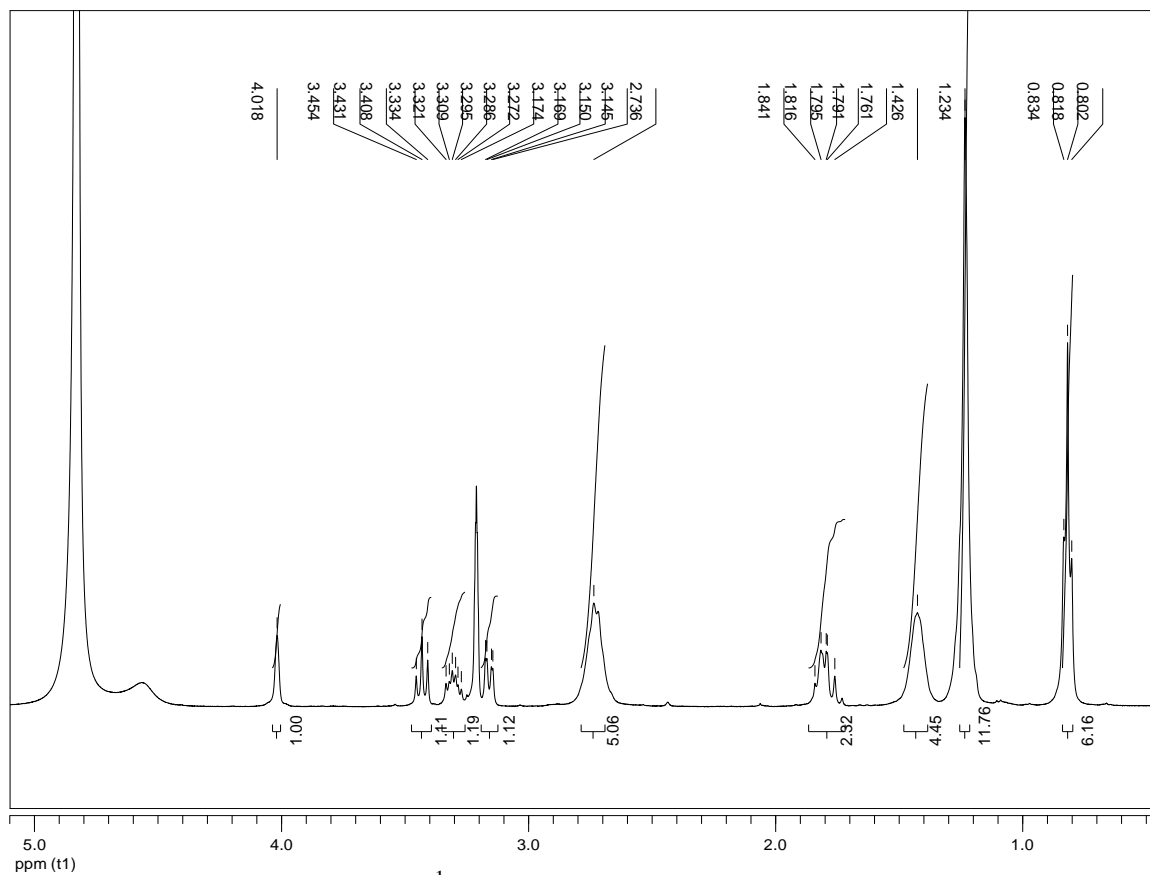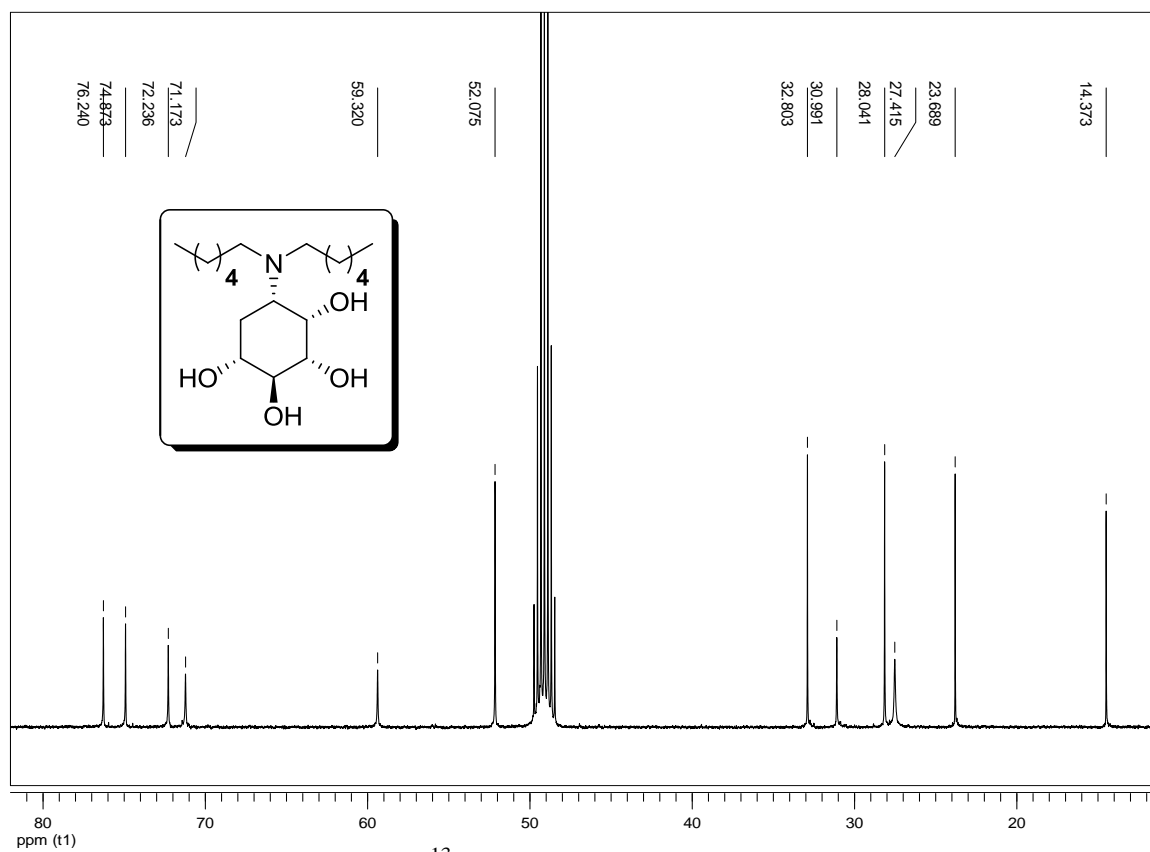

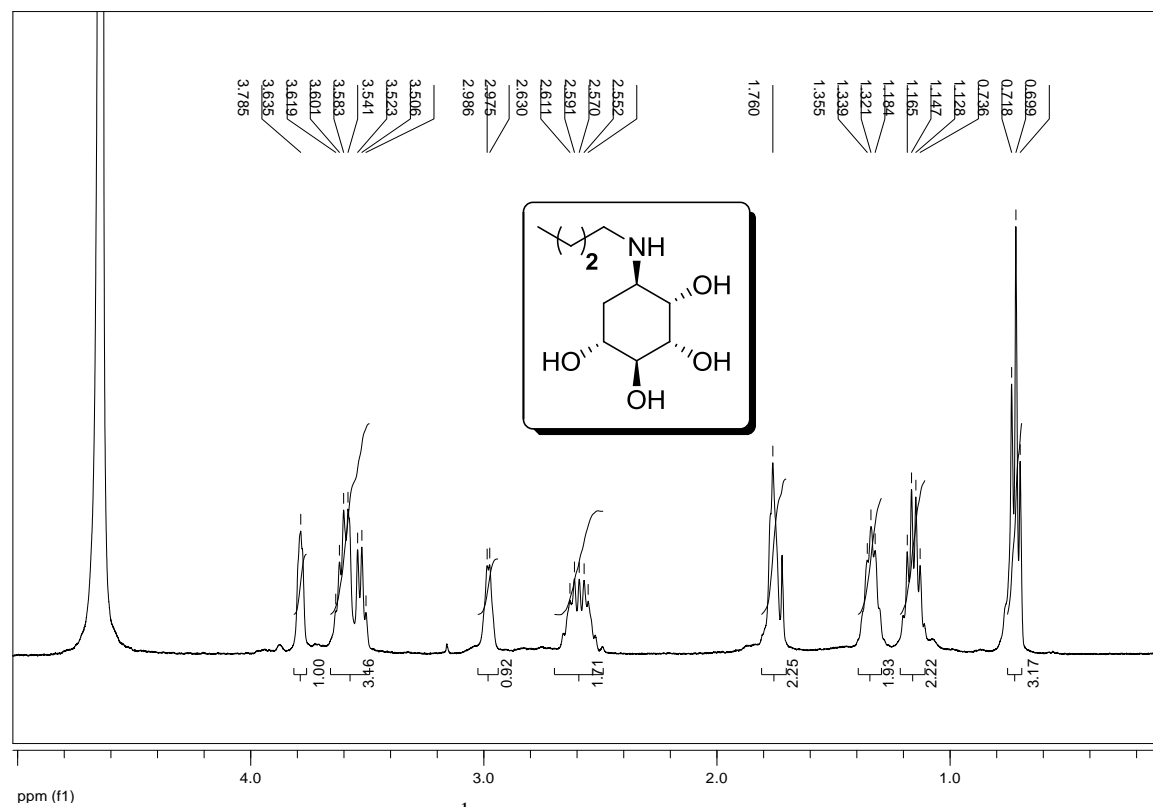

Figure 37. <sup>1</sup>H NMR spectrum of **34** (D<sub>2</sub>O)

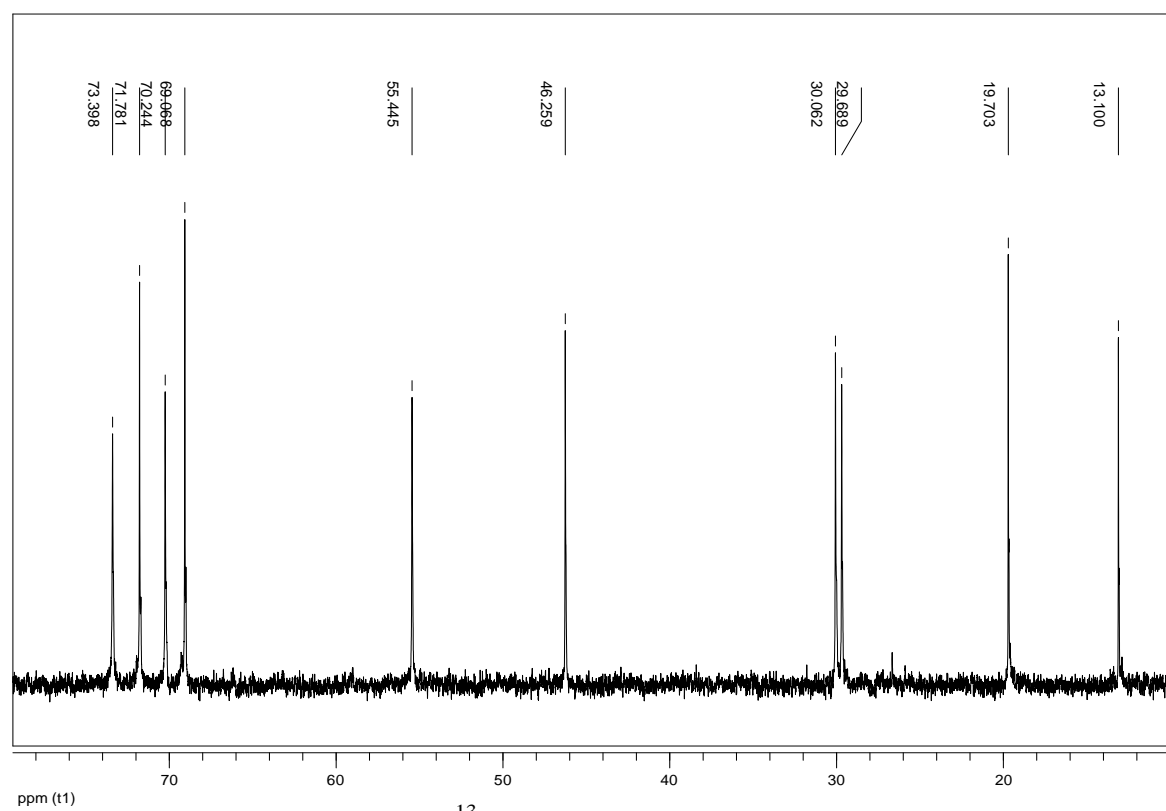

Figure 38. <sup>13</sup>C NMR spectrum of **34** (D<sub>2</sub>O)

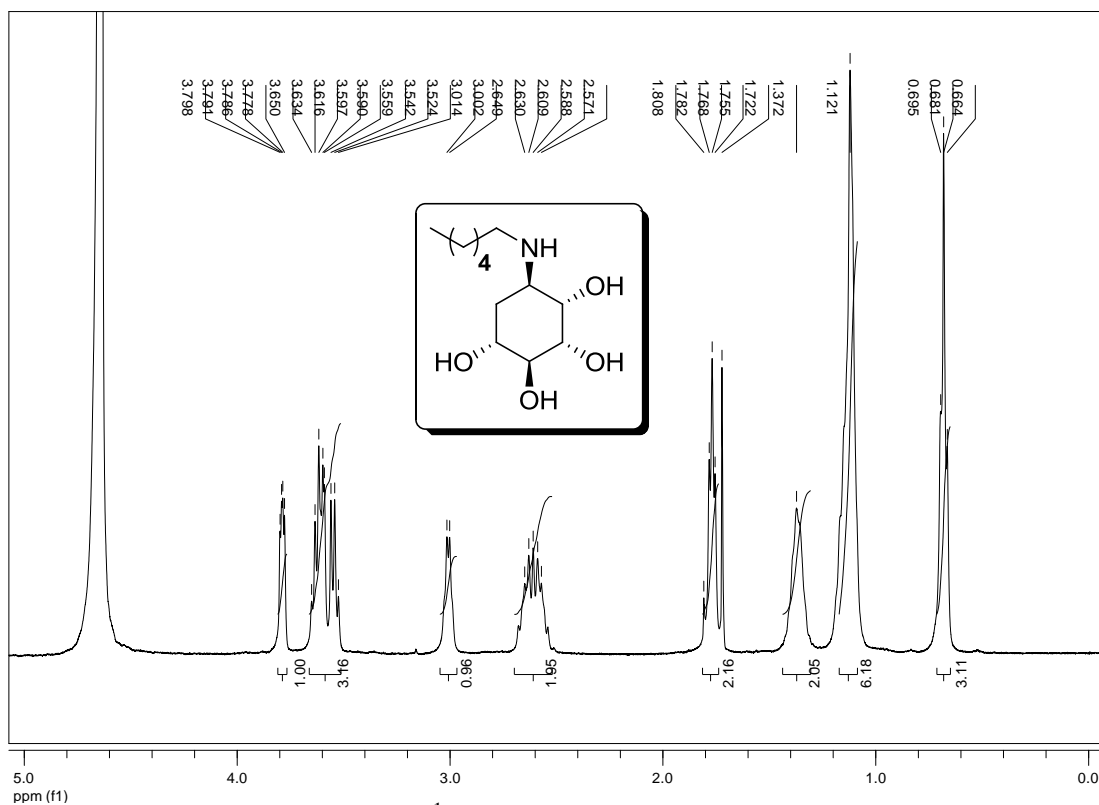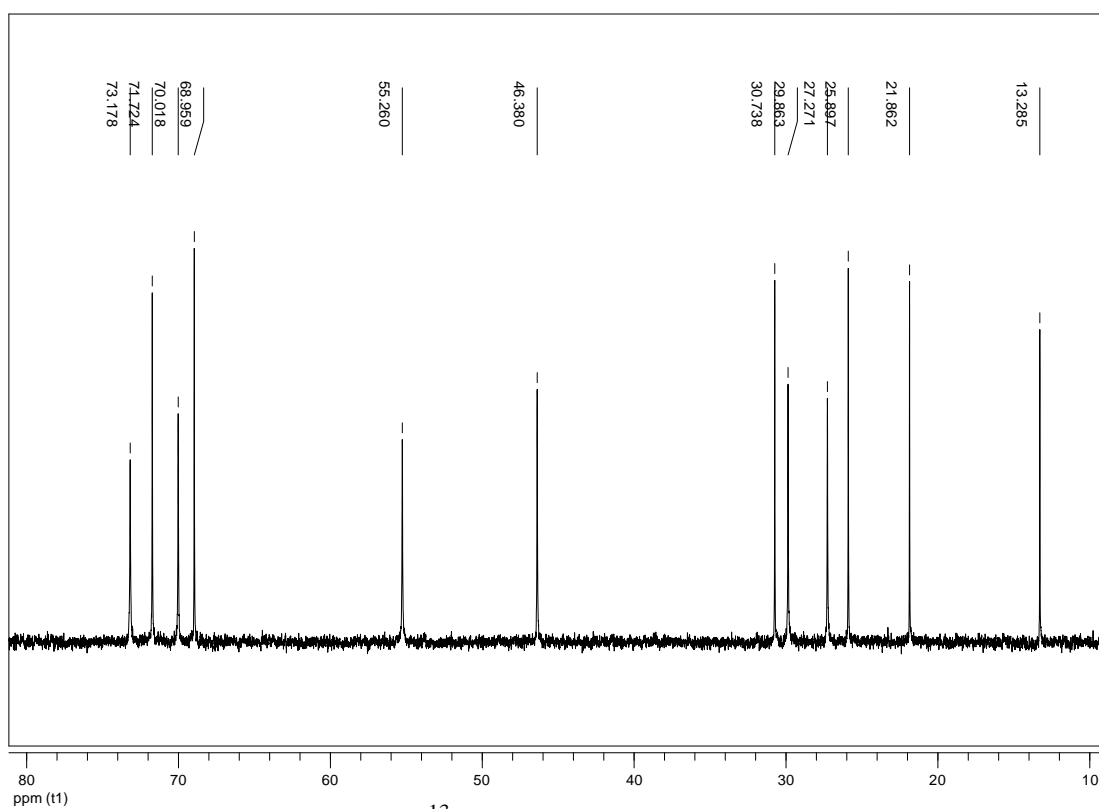

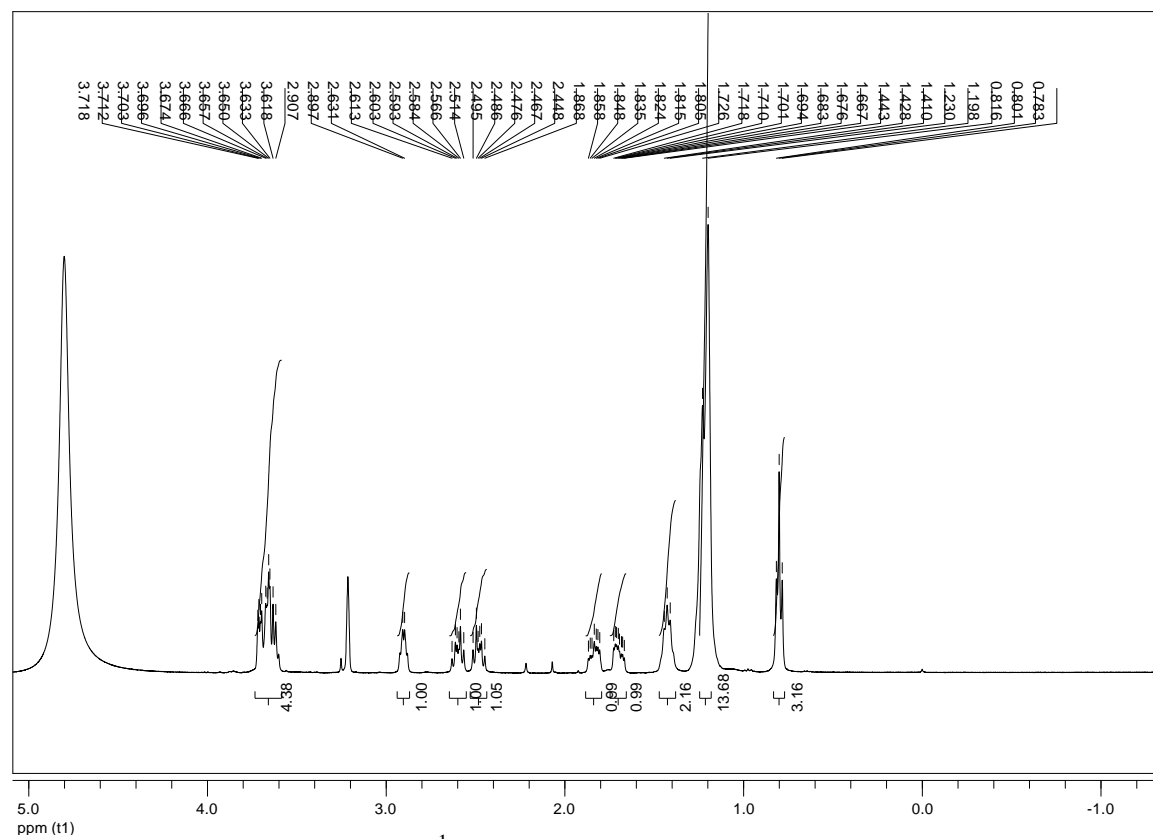

Figure 41.  $^1\text{H}$  NMR spectrum of **36** ( $\text{CD}_3\text{OD}$ )

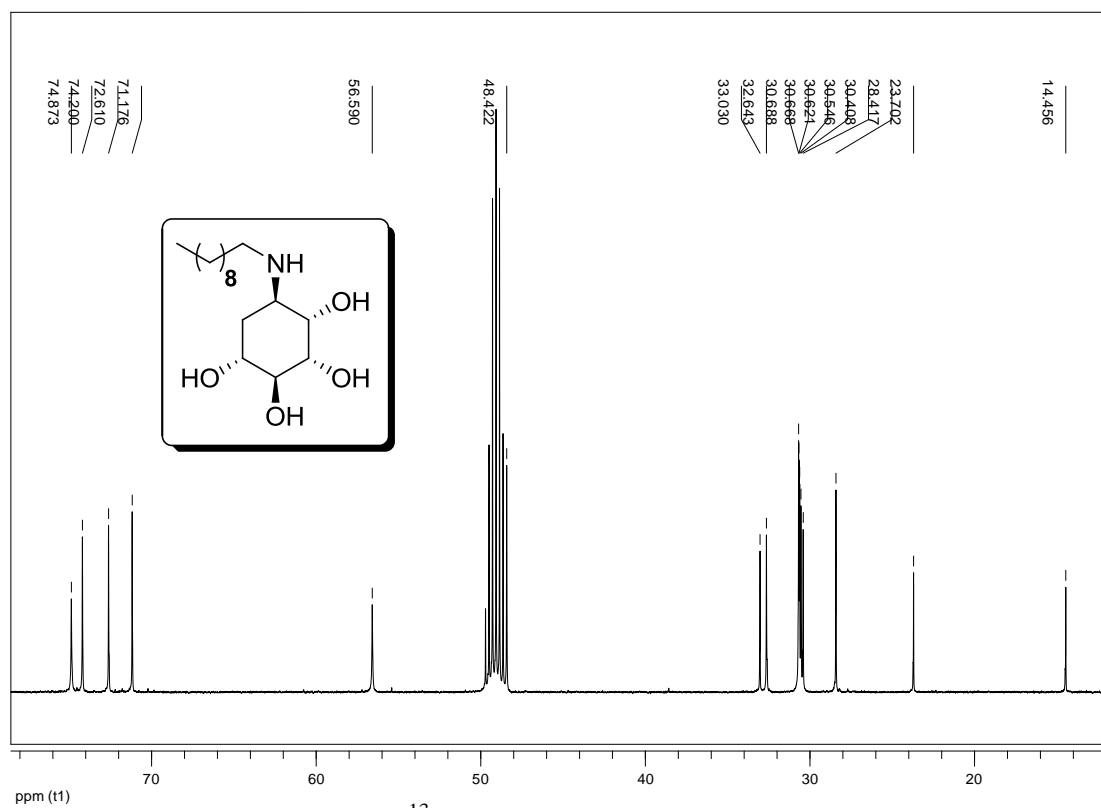

Figure 42.  $^{13}\text{C}$  NMR spectrum of **36** ( $\text{CD}_3\text{OD}$ )

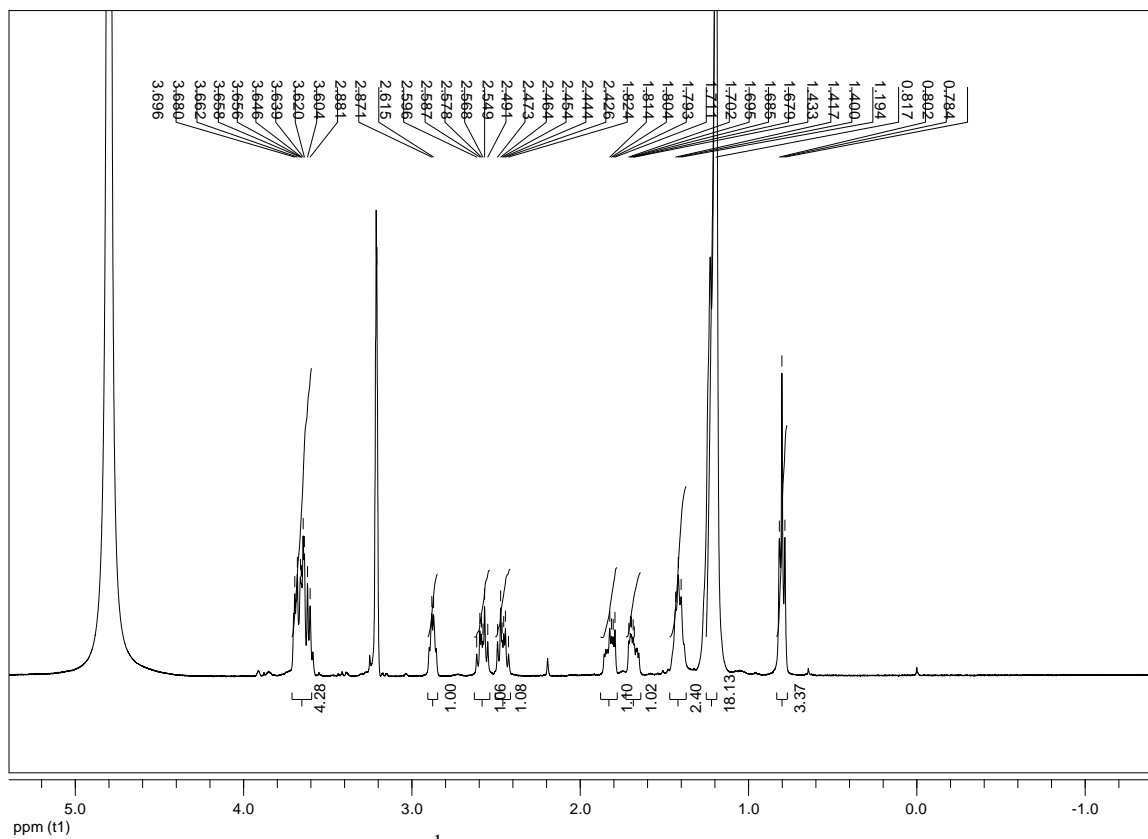

**Figure 43.**  $^1\text{H}$  NMR spectrum of **37** ( $\text{CD}_3\text{OD}$ )

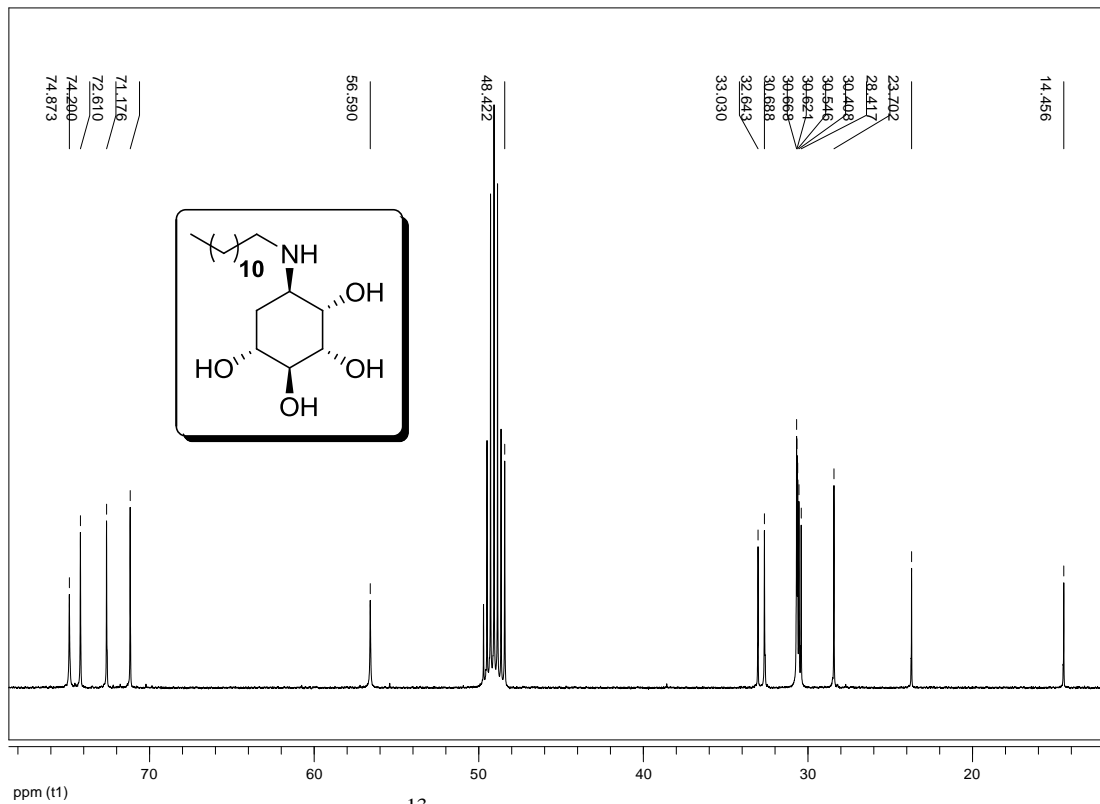

**Figure 44.**  $^{13}\text{C}$  NMR spectrum of **37** ( $\text{CD}_3\text{OD}$ )

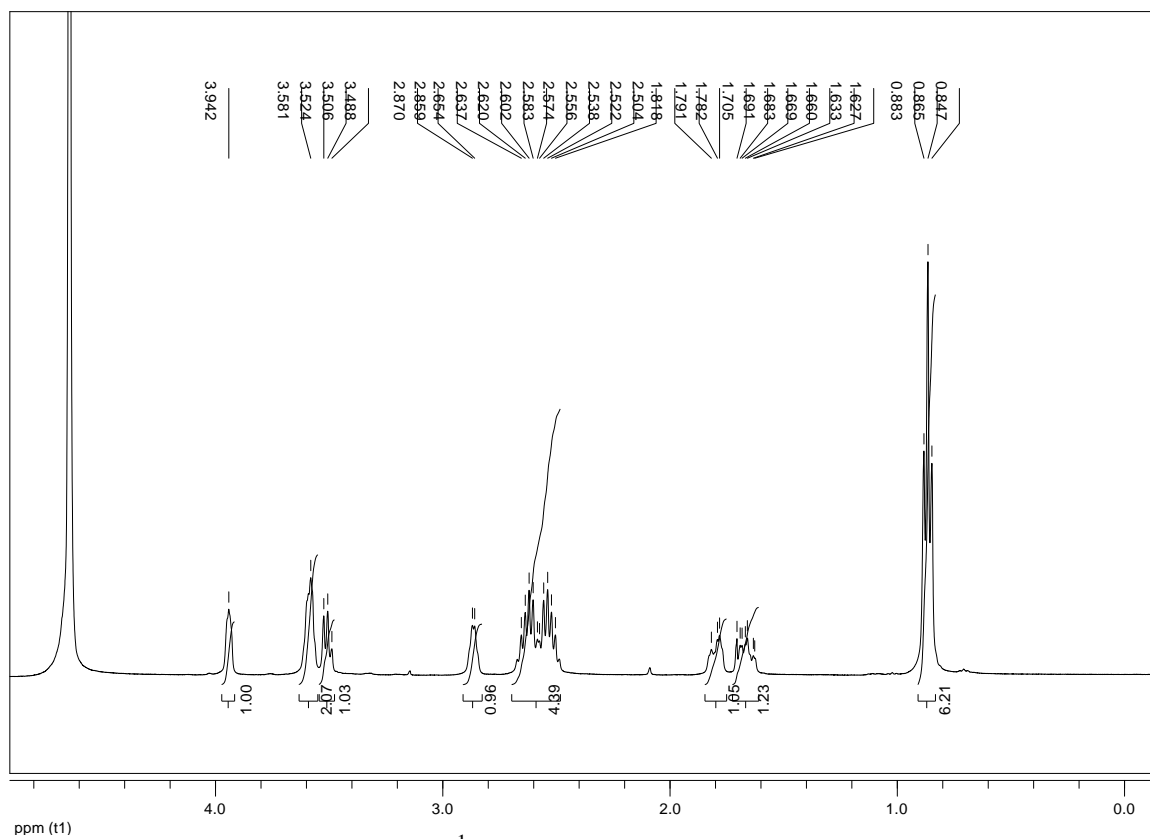

Figure 45.  $^1\text{H}$  NMR spectrum of **41** ( $\text{D}_2\text{O}$ )

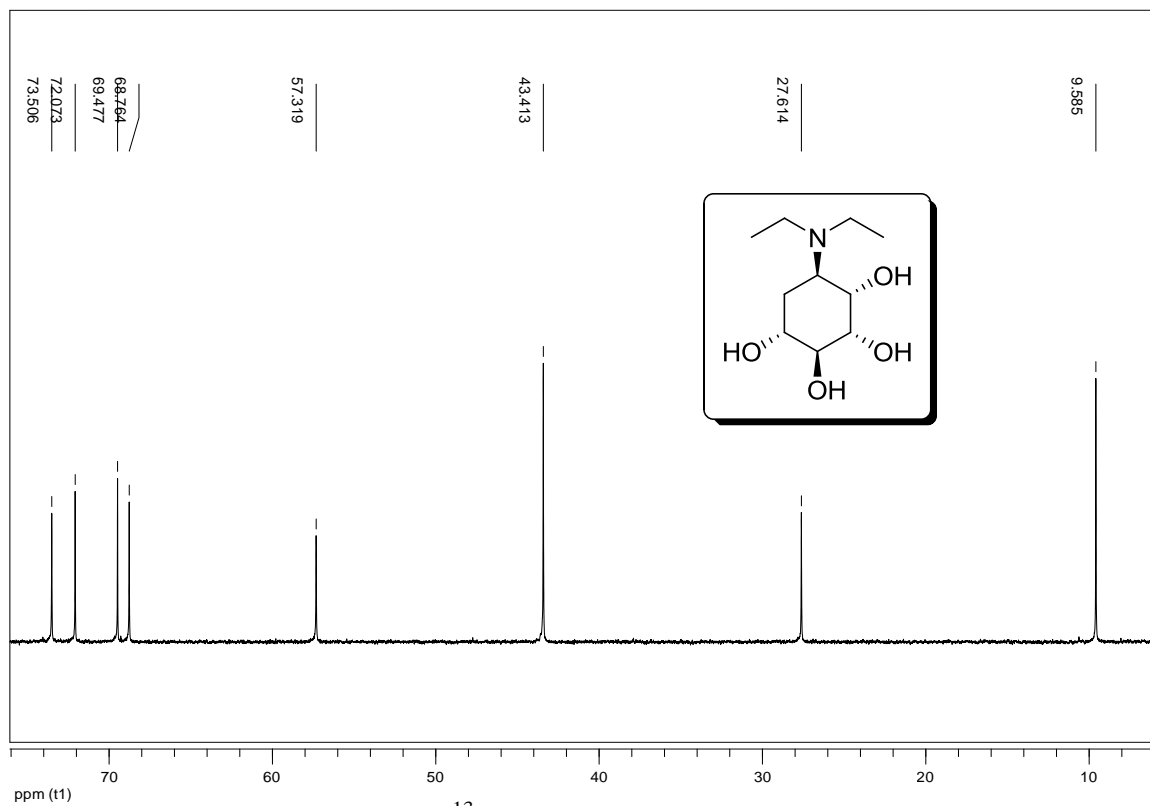

Figure 46.  $^{13}\text{C}$  NMR spectrum of **41** ( $\text{D}_2\text{O}$ )

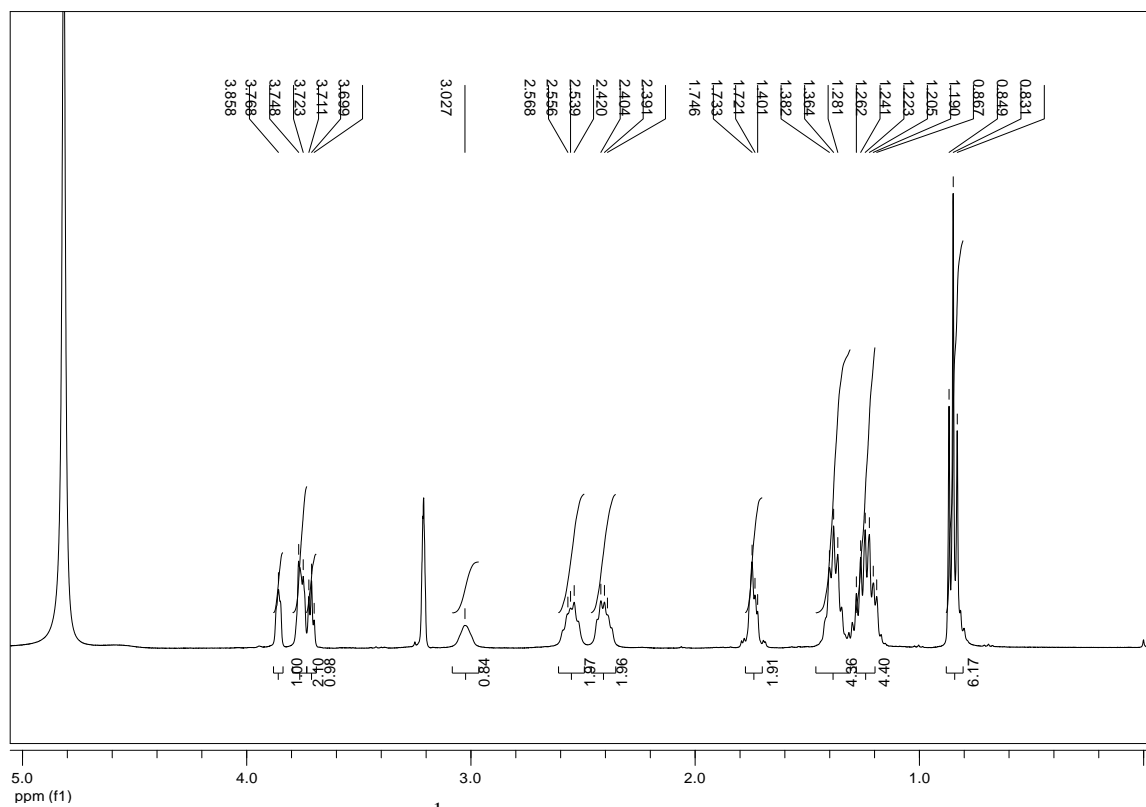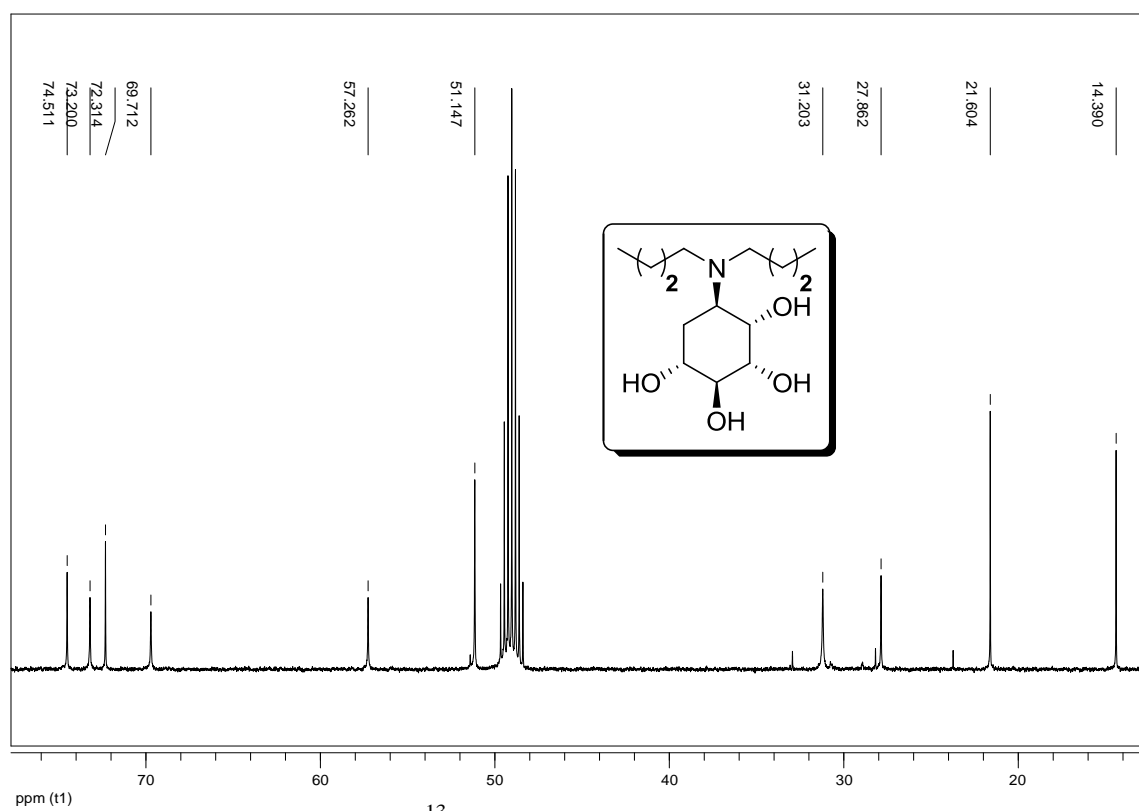



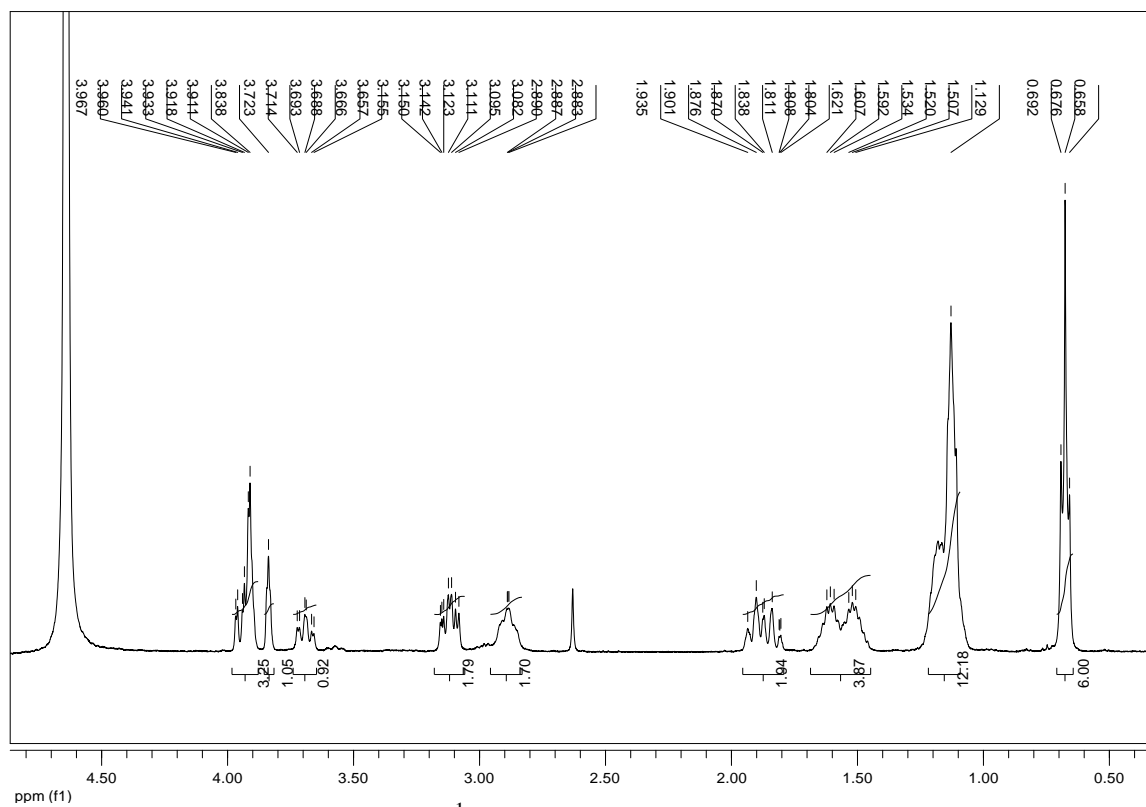

Figure 49.  $^1\text{H}$  NMR spectrum of **43** ( $\text{D}_2\text{O}$ )

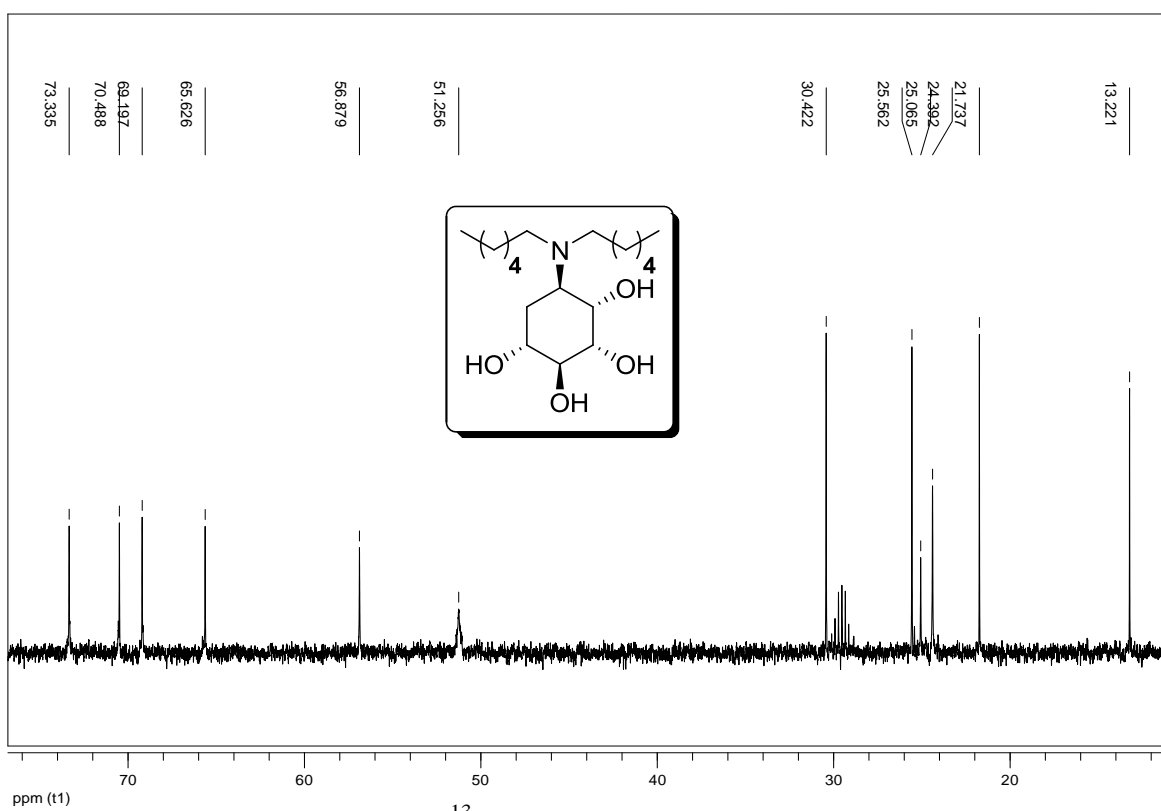

Figure 50.  $^{13}\text{C}$  NMR spectrum of **43** ( $\text{D}_2\text{O}$ )
